1 **Divergence, gene flow and the origin of leapfrog geographic distributions: The**  
2 **history of color pattern variation in *Phyllobates* poison-dart frogs**

3  
4  
5  
6 **Running Head:** Poison frog leapfrog distribution

7  
8  
9 Roberto Márquez<sup>1,2,\*</sup>, Tyler P. Linderoth<sup>3,†</sup>, Daniel Mejía-Vargas<sup>2</sup>, Rasmus Nielsen<sup>3,4,5</sup>,

10 Marcus R. Kronforst<sup>1,‡</sup>, Adolfo Amézquita<sup>2,‡</sup>

11  
12  
13 <sup>1</sup>Department of Ecology and Evolution, University of Chicago. Chicago, IL. 60637,  
14 USA.

15 <sup>2</sup>Department of Biological Sciences, Universidad de los Andes. A.A. 4976, Bogotá,  
16 D.C., Colombia.

17 <sup>3</sup>Department of Integrative Biology and Museum of Vertebrate Zoology, University of  
18 California, Berkeley. Berkeley, CA. 94720, USA.

19 <sup>4</sup>Department of Statistics, University of California, Berkeley. Berkeley, CA. 94720,  
20 USA.

21 <sup>5</sup>Center for GeoGenetics, University of Copenhagen, Copenhagen 1350, Denmark.

22  
23  
24 **\*Corresponding author.** Department of Ecology and Evolution, University of  
25 Chicago. 1101 East 57th St. Zoology 206. Chicago, IL. 60637. USA. Ph. 312-709-  
26 8658. Email: [rmarquezp@uchicago.edu](mailto:rmarquezp@uchicago.edu).

27 <sup>†</sup>Current address: Department of Genetics, University of Cambridge, Downing Street,  
28 Cambridge CB2 3EH, UK.

29 <sup>‡</sup>Joint senior authors.

30  
31  
32  
33 Submitted for consideration as an Original Article.

34     **Abstract**

35

36     The geographic distribution of phenotypic variation among closely related populations  
37     is a valuable source of information about the evolutionary processes that generate and  
38     maintain biodiversity. Leapfrog distributions, in which phenotypically similar  
39     populations are disjunctly distributed and separated by phenotypically distinct  
40     populations, represent geographic replicates for the existence of a phenotype, and are  
41     therefore especially informative. These geographic patterns have mostly been studied  
42     from phylogenetic perspectives to understand how common ancestry and divergent  
43     evolution drive their formation. Other processes, such as gene flow between  
44     populations, have not received as much attention. Here we investigate the roles of  
45     divergence and gene flow between populations in the origin and maintenance of a  
46     leapfrog distribution in *Phylllobates* poison frogs. We found evidence for high levels  
47     of gene flow between neighboring populations but not over long distances, indicating  
48     that gene flow between central populations may have a homogenizing effect that  
49     maintains their similarity, and that introgression between “leapfrogging” taxa has not  
50     played a prominent role as a driver of phenotypic diversity in *Phylllobates*. Although  
51     phylogenetic analyses suggest that the leapfrog distribution was formed through  
52     independent evolution of the peripheral (i.e. leapfrogging) populations, the elevated  
53     levels of gene flow between geographically close populations poise alternative  
54     scenarios, such as the history of phenotypic change becoming decoupled from  
55     genome-averaged patterns of divergence, which we cannot rule out. These results  
56     highlight the importance of incorporating gene flow between populations into the

57 study of geographic variation in phenotypes, both as a driver of phenotypic diversity

58 and as a confounding factor of phylogeographic inferences.

59

60 **Key Words:** Phylogeography, spatial population genetics, convergent evolution,

61 Dendrobatidae

62     **Introduction**

63

64     Geography has a strong influence on the diversification of closely related lineages,  
65     since it largely mediates the level of gene flow between them (Huxley, 1942; Mayr,  
66     1942). Therefore, studying the geographic distribution of phenotypic and genetic  
67     variation among such lineages can generate valuable insights into the processes that  
68     generate biological diversity. An intriguing pattern of geographic variation is the  
69     “leapfrog” distribution, where phenotypically similar, closely related populations (of  
70     the same or recently diverged species) are disjunctly distributed and separated by  
71     phenotypically different lineages to which they are also closely related (Chapman,  
72     1923; Renssen, 1984). Such patterns have been reported in multiple taxa, such as birds  
73     (e.g. Cadena, Cheviron, & Funk, 2010; Chapman, 1923; Norman, Christidis, Joseph,  
74     Slikas, & Alpers, 2002; Renssen, 1984), flowering plants (Shun-ichi Matsumura,  
75     Yokoyama, Tateishi, & Maki, 2006; Shun’Ichi Matsumura, Yokohama, Fukuda, &  
76     Maki, 2009), and butterflies (Brower, 1996; Emsley, 1965; Hovanitz, 1940; Sheppard,  
77     Turner, Brown, Benson, & Singer, 1985). Since leapfrog patterns represent repeated  
78     instances of similar phenotypes in space, they provide a rich opportunity to  
79     understand the processes generating geographic variation in phenotypes.

80

81     Two main hypotheses have been put forward to explain the origin of leapfrog  
82     distributions (Norman et al., 2002; Renssen, 1984): First, the phenotypically similar,  
83     geographically disjunct populations can owe their resemblance to recent common  
84     ancestry (i.e. they are descendants of an ancestral population with the same

85 phenotype), and the disjunct range of “leapfrogging” forms is due to biogeographic  
86 processes such as long-range migration or the extinction of geographically  
87 intermediate populations. Second, the distribution of phenotypes may be due to  
88 evolutionary convergence of populations with similar phenotypes, or divergence of  
89 the central (intervening) populations from the ancestral phenotype. Clear phylogenetic  
90 predictions can be drawn from these hypotheses: If phenotypic similarity among the  
91 leapfrogging populations is due solely to recent common ancestry, then such  
92 populations should be more closely related to one another than to geographically close  
93 populations that display the intervening phenotype. If the geographic distribution of  
94 phenotypes is due to convergent or divergent evolution then a correspondence  
95 between phylogeny and phenotypes is not expected. In this case, however, ancestral  
96 state reconstructions can identify whether the central or peripheral populations exhibit  
97 derived (i.e. divergent) phenotypes. Accordingly, efforts to elucidate the evolutionary  
98 mechanisms behind leapfrog distributions have mainly focused on inferring the  
99 phylogenetic relationships among populations and using them to reconstruct the  
100 evolution of the phenotype in question (e.g. Brower, 1996; Cadena et al., 2010;  
101 Shun’Ichi Matsumura et al., 2009; Norman et al., 2002; Quek et al., 2010).

102  
103 Although a cladogenetic description of population history can reveal a great deal  
104 about the origin of leapfrog distributions, it is unable to capture some important  
105 aspects of the diversification process. Among them is the extent of historical and  
106 contemporary gene flow between populations (or its absence), which can play an  
107 important role in the formation of leapfrog distributions. For instance, reduced levels

108 of genetic exchange between populations with different phenotypes will promote the  
109 existence of such differences, while introgressive hybridization between populations  
110 can facilitate phenotypic convergence between them. Furthermore, if gene flow  
111 between geographically close populations with different phenotypes is pervasive, it  
112 can homogenize previous genetic divergence between these populations, decoupling  
113 the history of the phenotype from genome-wide patterns of divergence (Hines et al.,  
114 2011; James, Arenas-Castro, Groh, Engelstaedter, & Ortiz-Barrientos, 2020), which  
115 can complicate inferences related to the origin of leapfrog distributions.

116

117 Here we examine the processes driving the origin of a leapfrog distribution present in  
118 *Phyllobates* poison-dart frogs. This genus is found from Southern Nicaragua to  
119 Western Colombia, and is composed of five nominal species (Myers, Daly, & Malkin,  
120 1978; Silverstone, 1976): *P. vittatus*, *P. lugubris*, and *P. aurotaenia*, which exhibit a  
121 bright dorsolateral stripe on a dark background, and *P. terribilis* and *P. bicolor*, which  
122 display solid bright-yellow dorsal coloration (Fig. 1A; note that at a handful of  
123 localities *P. terribilis* exhibit solid mint-green color patterns). The two latter species  
124 exhibit a leapfrog distribution in Western Colombia, separated by *P. aurotaenia*: *P.*  
125 *bicolor* occurs on the slopes of the Western Andes, in the upper San Juan river basin,  
126 *P. aurotaenia* in the lowlands along the San Juan and Atrato Drainages and onto the  
127 Pacific coast, and *P. terribilis* along the Pacific coast south of the San Juan's mouth  
128 (Fig. 1C).

129

130 Early systematic work grouped *P. terribilis* and *bicolor* as sister species based on  
131 morphological and ontogenetic characters (Maxson & Myers, 1985; Myers et al.,  
132 1978). Although an early mitochondrial phylogeny supported these relationships  
133 (Widmer, Lötters, & Jungfer, 2000), subsequent work has consistently recovered *P.*  
134 *terribilis* and *P. bicolor* as non-sister taxa (Grant et al., 2006, 2017; Márquez,  
135 Corredor, Galvis, Góez, & Amézquita, 2012; Santos et al., 2009), and even suggested  
136 that *P. aurotaenia* may actually represent two distinct lineages, one sister to *P.*  
137 *bicolor* and the other to *P. terribilis* (Grant et al., 2017; Santos et al., 2009). Although  
138 these studies only included 1-4 samples per *Phyllobates* species, and were based on  
139 DNA sequences from a small number of markers (1-7 loci), their results are  
140 compatible with convergent evolution giving rise to the leapfrog distribution.

141

142 In this study we aim to shed light on the demographic processes involved in the origin  
143 of the current geographic distribution of aposematic coloration in *Phyllobates* poison  
144 frogs. Based on substantially increased sampling across Colombian populations and  
145 thousands of genome-wide markers, we leverage phylogenetics and spatial population  
146 genetics to 1) elucidate the extent of genetic structure and evolutionary relationships  
147 among populations, and 2) evaluate the role of gene flow among populations in the  
148 formation of the leapfrog distribution.

149

## 150 **Materials and Methods**

151

152 To obtain a representative sample of Colombian *Phyllobates* populations, we  
153 conducted field expeditions to 23 localities throughout the genus's range (Fig. 2B),  
154 resulting in tissue (i.e. mouth swab, toe-clip, or liver) samples from 108 individuals  
155 (Table S1). In addition, we obtained eight samples of *P. vittatus* and *P. lugubris*, (four  
156 samples per species; Table S1) to serve as outgroups in our analyses. Both species are  
157 distributed in Central America, and have been consistently found to be the sister  
158 group of Colombian *Phyllobates* (Grant et al., 2006, 2017; Santos et al., 2009;  
159 Widmer et al., 2000).

160

#### 161 *mtDNA Sequencing and analysis*

162

163 To gain initial insight into the levels of genetic variation and structure among  
164 populations we sequenced fragments of three mtDNA markers: 16S rRNA (16S;  
165 569bp), Cytochrome Oxidase I (COI barcoding fragment; 658bp), and Cytochrome b  
166 (Cytb; 699bp) from 74 individuals. We extracted DNA using either Qiagen DNeasy  
167 spin columns or a salt precipitation protocol (Miller, Dykes, & Polesky, 1988), and  
168 used primers 16Sar and 16Sbr (Palumbi et al., 1991), Chmf4 and Chmr4 (Che et al.,  
169 2012), and CytbDen3-L and CytbDen1-H (Santos & Cannatella, 2011) to amplify the  
170 16S, COI, and Cytb loci, respectively. Thermal cycling protocols consisted of 2 min at  
171 95°C, 30-35 cycles of 30 sec at 95°C, 1 min at 45°C and 1.5 min at 72°C, and a final 5  
172 min at 72°C. PCR products were purified with ExoSAP (Affymetrix) and sequenced  
173 in both directions using an ABI 3500 Genetic Analyzer (Applied Biosystems).



174 Chromatograms were assembled and visually inspected in Geneious R9 (Kearse et al.,  
175 2012) to produce finalized consensus sequences.

176

177 We aligned our sequences and those available in GenBank (Table S1) using  
178 MUSCLE (Edgar, 2004), and built mtDNA trees with PhyML 3.3 (Guindon et al.,  
179 2010) and MrBayes 3.2.6 (Altekar, Dwarkadas, Huelsenbeck, & Ronquist, 2004;  
180 Ronquist et al., 2012). MrBayes analyses consisted of 10 million iterations (two runs  
181 with four chains each), sampling every 1,000 iterations, and discarding the first 2,500  
182 trees (25%) as burnin. PhyML runs started from five different random trees, and used  
183 SPR moves to search the tree space. Nodal support was evaluated using aBayes scores  
184 (Anisimova, Gil, Dufayard, Dessimoz, & Gascuel, 2011). To obtain an estimate of  
185 divergence times between mtDNA haplotypes, we inferred a time-calibrated tree  
186 using BEAST v. 2.5.0. (Bouckaert et al., 2019). Based on results from previous work  
187 (Santos et al., 2014), we set a log-normal prior with mean 8.13 million years (MY)  
188 and standard deviation 1.2 MY (i.e.  $\log(\text{mean}) = 2.12$ ,  $\log(\text{s.d.}) = 0.1$ ) for the root age  
189 of *Phyllobates*. We used a Calibrated Yule tree prior, and set default priors for all  
190 other parameters, except for the clock rate mean and the Yule birth rate, which were  
191 set to  $\text{gamma}(0.01, 1000)$ . We ran the MCMC sampler for 100 million iterations,  
192 sampling every 10,000, and generated a maximum clade credibility (MCC) tree using  
193 Tree Annotator (distributed with BEAST) after discarding the first 5% of trees as  
194 burnin. Mixing and stationarity of BEAST and MrBayes runs were evaluated visually  
195 and based on effective sample sizes (ESS) using Tracer v. 1.5 (Rambaut &  
196 Drummond, 2009). All mtDNA analyses were performed under partitioning schemes

197 and molecular evolution models chosen with PartitionFinder2 (Lanfear, Frandsen,  
198 Wright, Senfeld, & Calcott, 2017).

199

#### 200 *Transcriptome-enabled exon capture*

201

202 Based on the results of mtDNA analyses we chose 63 samples (60 ingroup, 3  
203 outgroup) from 17 localities (Table S1) representing the range of observed mtDNA  
204 variation among Colombian populations, and used them to perform transcriptome-  
205 enabled exon capture (Bi et al., 2012; Hodges et al., 2007). Briefly, we designed a set  
206 of DNA capture probes based on a transcriptome assembly and used them to enrich  
207 standard Illumina libraries for a subset of the genome.

208

209 *Transcriptome sequencing.* We generated a transcriptome assembly from liver,  
210 muscle, skin, and heart tissue of a single *P. bicolor* juvenile. RNA was extracted using  
211 Qiagen RNeasy spin columns, and pooled in equimolar ratios by tissue type to build a  
212 single cDNA library, which was sequenced on an Illumina HiSeq 2000. We filtered  
213 and trimmed reads using Trimmomatic v. 0.25 (Bolger, Lohse, & Usadel, 2014), and  
214 used Trinity (release 2013-02-25; Grabherr et al., 2011) to assemble them under  
215 default parameters, except for the minimum contig length, which was increased to  
216 250bp. Finally we collapsed redundant contigs (e.g. alternative isoforms) with CD-  
217 HIT-EST V.4.5.3 (Fu, Niu, Zhu, Wu, & Li, 2012).

218

219 *Enrichment probe design.* We annotated our transcriptome using BLASTX (Altschul,  
220 1997) against *Xenopus tropicalis* proteins (JGI 4.2.72), and used Exonerate (Slater &  
221 Birney, 2005) to identify intron-exon boundaries in order to split transcripts into  
222 individual exons. We then chose a final set of exons to enrich in the following way:  
223 First we discarded those under 100bp, with GC content below 40% and above 70%, or  
224 which overlapped by more than 10bp based on Exonerate annotations. Next, we  
225 identified putatively repetitive elements and RNA-coding genes (e.g. rRNAs) in our  
226 transcriptome assembly with RepeatMasker v. 4.0 (Smith, Hubley, & Green, 2013)  
227 and BLASTn, respectively, and removed exons overlapping them. Finally, we blasted  
228 our exon set against itself with BLASTn under default parameters, and whenever two  
229 or more exons matched each other (e-value <  $10^{-10}$ ), we retained only one of them.  
230 This resulted in 38,888 exons (7.57Mb) that passed filters, which were used to design  
231 1,943,120 100bp probes that were tiled at 3bp and printed on two Agilent SureSelect  
232 custom 1M-feature microarrays.

233

234 *DNA library preparation, target enrichment, and sequencing.* We extracted DNA as  
235 described above, and used a Diagenode Bioruptor to shear each extraction to a ~100-  
236 500bp fragment distribution by performing 3-4 rounds of sonication (7min of 30s  
237 on/off cycles per round). DNA libraries were built following Meyer & Kircher (2010),  
238 except for bead cleanups, which were done using a 1.6:1 ratio of beads to library  
239 (instead of the recommended 1.8:1) to obtain a slightly larger final fragment size  
240 distribution. Finished libraries were combined in equimolar ratios into two 22.5  $\mu$ g  
241 pools (one per array) for target enrichment. Array hybridization was performed

242 largely following (Hodges et al., 2009) with minor modifications: Each library pool  
243 was mixed with xGen Universal P5 and P7 blocking oligonucleotides and a mixture of  
244 chicken, human, and mouse COT-1 DNA. The two capture eluates were amplified  
245 separately by 18 cycles of PCR. To reduce the propagation of PCR-induced errors,  
246 each eluate was amplified in four parallel reactions. PCR products were pooled so that  
247 both captures were equally represented, and sequenced on Illumina HiSeq 2500 and  
248 4000 machines.

249

250 *Bioinformatic pipeline.* De-multiplexed read files were filtered by 1) collapsing PCR-  
251 duplicate reads with SuperDeduper (Petersen, Streett, Gerritsen, Hunter, & Settles,  
252 2015), 2) trimming low quality bases and removing adapter contamination with  
253 Trimomatic (Bolger et al., 2014) and Skewer (Jiang, Lei, Ding, & Zhu, 2014) under  
254 default parameters, except for the minimum read length, which was increased to 36  
255 bp, and 3) merging overlapping read pairs with FLASH (Magoč & Salzberg, 2011).  
256 To generate a reference for read mapping, we combined all cleaned reads from the  
257 ingroup species (i.e. *P. terribilis*, *aurotaenia*, and *bicolor*), and generated six *de novo*  
258 assemblies with different kmer sizes ( $k = 21, 31, 41, 51, 61, \text{ and } 71$ ) using ABySS (J.  
259 T. Simpson et al., 2009). We then merged the six assemblies using CD-HIT-EST and  
260 Cap3 (Huang & Madan, 1999). Finally, we identified contigs that matched our target  
261 exons using BLASTn, and retained only these for further analyses.

262

263 Reads from each sample were mapped to the reference using Bowtie2 v. 2.1.0  
264 (Langmead & Salzberg, 2012), and outputs were sorted with Samtools v. 1.0 (Li et al.,

265 2009), de-duplicated with Picard v.1.8.4 (<http://broadinstitute.github.io/picard>), and  
266 re-aligned around indels with GATK v. 3.3.0 (McKenna et al., 2010). We filtered our  
267 data in the following ways: First, we performed a reciprocal blast using the methods  
268 described above and removed any contigs with more than one match (e-value<10<sup>-10</sup>).  
269 Second, we used ngsParalog (<https://github.com/tplinderth/ngsParalog>) to identify  
270 contigs with variants stemming from read mismapping due to paralogy and/or  
271 incorrect assembly. This program uses allele frequencies to calculate a likelihood ratio  
272 for whether the reads covering a site are derived from more than one locus in the  
273 genome, while incorporating the uncertainty inherent in NGS genotyping. We  
274 calculated p-values for these likelihood ratios based on a 50:50 mixed  $\chi^2$  distribution  
275 with one and zero degrees of freedom under the null, and removed any contigs with  
276 significantly paralogous sites after Bonferroni correction ( $\alpha = 0.05$ ). Third, we  
277 restricted all analyses to contigs covered by at least one read in at least 20 individuals,  
278 bases with quality above 30, and read pairs mapping uniquely to the same contig (i.e.  
279 proper pairs) with mapping quality above 20. Finally, we removed samples with less  
280 than 2.5 million sites covered by at least one read after filtering. This resulted in a  
281 dataset of 32,516 contigs (12.95 Mb) and 57 samples, which were used in all  
282 downstream analyses.

283

#### 284 *Population Structure*

285

286 To characterize genome-wide patterns of population differentiation we used our exon  
287 capture dataset to perform Principal Component Analysis (PCA) of genetic

288 covariances calculated in PCangsd v.0.94 (Meisner & Albrechtsen, 2018), to estimate  
289 admixture proportions ( $k = 2-9$ ) in ngsAdmix v.32 (Skotte, Korneliussen, &  
290 Albrechtsen, 2013), and to build a minimum-evolution tree in FastME v.2.1.5  
291 (Lefort, Desper, & Gascuel, 2015), using genetic distances estimated with ngsDist  
292 (Vieira, Lassalle, Korneliussen, & Fumagalli, 2016). Nodal support for this tree was  
293 evaluated using 500 bootstrapped distance matrices produced in ngsDist by sampling  
294 blocks of 10 SNPs. These three analyses used genotype likelihoods (GL) as input,  
295 which were estimated in Angsd v.0.9.18 (Korneliussen, Albrechtsen, & Nielsen,  
296 2014) at sites covered by at least one read in at least 50% of the samples. PCA and  
297 ngsAdmix analyses excluded sites with minor allele frequencies below 0.05, and  
298 genetic distance estimation for the ME tree was restricted to variable sites (i.e. SNP  
299 p-value < 0.05).

300

301 Finally, we reconstructed a population graph to evaluate the relationships among our  
302 sampling localities using Treemix. We called genotypes using the HaplotypeCaller  
303 and GenotypeGVCFs tools of GATK v.3.3.0 under default parameters, except for the  
304 heterozygosity prior, minimum base quality, and minimum variant-calling confidence,  
305 which were increased to 0.005, 30, and 20, respectively, to accommodate for the  
306 multi-species nature of our dataset. We then obtained allele counts for biallelic SNPs  
307 that were at least 1kb apart within each contig (usually resulting in a single SNP per  
308 contig, since most contigs were under 1kb), and with at least 50% genotyping (20,275  
309 SNPs), using Plink v.1.90 (Purcell et al., 2007). In two cases, two nearby populations  
310 of the same color pattern (16.4 and 19.7 Km apart; Fig S1), which clustered closely in

311 all other genetic structure analyses, were merged into single demes for allele count  
312 estimation due to small sample sizes. In addition, since we only had exon capture data  
313 for one *P. vittatus* individual, only *P. lugubris* was used as outgroup in this analysis.  
314 We ran Treemix v.1.13 assuming  $m = 0-6$  migration edges, and chose the optimal  
315 number of migration edges by performing likelihood ratio tests in which we compared  
316 each value of  $m$  to the one immediately smaller. P-values were calculated based on a  
317  $\chi^2$  distribution with two degrees of freedom, since adding an extra edge adds two  
318 parameters (weight and direction of migration) to the model. This approach recovered  
319  $m=2$  as the most likely scenario (Table S2); results for  $m=0-6$  are presented in Fig.  
320 S2.

321

### 322 *Phylogenetic relationships between lineages*

323

324 We reconstructed a species tree under the multispecies coalescent model, assuming  
325 independent sites, as implemented in SNAPP (Bryant, Bouckaert, Felsenstein,  
326 Rosenberg, & RoyChoudhury, 2012). SNAPP requires individuals to be assigned to  
327 operational taxonomic units (OTUs) *a priori*. Given our small sample sizes for some  
328 localities, as well as the evidence of gene flow between localities (see Results  
329 section), we took an *ad-hoc* approach and grouped our sampling localities into eight  
330 geographically and phenotypically coherent groups that showed evidence of being  
331 genetically distinct entities (see locality colors in Fig. 2B). Further details on our OTU  
332 selection criteria can be found in the online supplement.

333 For computational efficiency, SNAPP was run on a reduced version of the Treemix  
334 dataset described above, restricted to SNPs genotyped for at least 75% of individuals  
335 and at least one member of each OTU (5,938 SNPs). We ran the MCMC sampler  
336 under default priors for 1,000,000 iterations, sampling every 250, and discarded the  
337 first 150,000 as burnin. Stationarity and mixing were evaluated in Tracer (Rambaut &  
338 Drummond, 2009) as detailed above, and the posterior tree distribution was  
339 summarized as a maximum clade credibility (MCC) tree in TreeAnnotator. To obtain  
340 estimates of divergence times between OTUs, we assumed a mutation rate of  $\mu = 1e^{-9}$   
341 mutations per year (Crawford, 2003; Sun et al., 2015), and a generation time of one  
342 year (*Phylllobates* frogs are sexually mature at ~10-18 months after hatching; Myers et  
343 al., 1978; R. Márquez *pers obs.*), and converted branch lengths to time units as  $T =$   
344  $(\tau g/\mu)$ , where  $T$  is the divergence time in years,  $\tau$  the branch length in coalescent units,  
345  $g$  the generation time, and  $\mu$  the mutation rate (Bryant et al., 2012).

346

#### 347 *Phylogenetic Comparative Analyses*

348

349 We reconstructed ancestral color patterns along the SNAPP MCC tree using  
350 maximum parsimony (Fitch, 1971) in the R package *phangorn* (Schliep, 2011).  
351 Aposematic coloration has been shown to co-evolve with several other traits, such as  
352 body size, toxicity, and diet specialization in dendrobatid frogs (Pough & Taigen,  
353 1990; Santos & Cannatella, 2011; Summers & Clough, 2001). Therefore, we  
354 investigated the extent of correlated evolution between color pattern, body size, and  
355 toxicity. We used the snout-to-vent length (SVL) as a proxy for body size, and the



356 average amount of batrachotoxin (BTX) in a frog's skin as a proxy for toxicity. BTX  
357 is the most abundant and toxic alkaloid found in *Phyllobates* skins (Märki & Witkop,  
358 1963; Myers et al., 1978). BTX levels were obtained from Table 2 of (Daly, Myers, &  
359 Whittaker, 1987), and SVL was measured from specimens in natural history  
360 collections (193 specimens; Table S3). We used mean SVL values for each lineage in  
361 analyses, and log-transformed BTX levels to attain normality of residuals.  
362 Correlations between traits were evaluated using phylogenetic generalized least  
363 squares regression (pGLS; Grafen, 1989; Martins & Hansen, 1997) with either  
364 Brownian motion (Felsenstein, 1985), Lambda (Pagel, 1999), or Ornstein–Uhlenbeck  
365 (Martins & Hansen, 1997) correlation structures. The best correlation structure was  
366 chosen by performing pGLS with the three correlation structures and comparing the  
367 fit of each model based on the AIC. Correlation structures were generated using the R  
368 package *ape* (Paradis, Claude, & Strimmer, 2004) and regressions were performed in  
369 the *nlme* package (Pinheiro, Bates, DebRoy, & Sarkar, 2017). In addition to the  
370 highest clade credibility tree, we also conducted tests of phylogenetic correlations on  
371 1,000 randomly selected trees from the post-burnin SNAPP posterior distribution to  
372 account for phylogenetic uncertainty.

373

#### 374 *Spatial population genetics*

375

376 To investigate the extent of divergence and gene flow between species in an explicitly  
377 spatial context we first we generated a geo-genetic map of the Colombian *Phyllobates*  
378 populations in SpaceMix (Bradburd, Ralph, & Coop, 2016). This consists of a

379 bidimensional plot where the distance between two populations represents their  
380 expected geographic distance under stationary isolation by distance, accounting for  
381 the fact that a fraction of a population's alleles may have been acquired through  
382 migration from another region of the map, whose location is also estimated. As input  
383 we used allele counts generated as detailed above (see *Population Structure* section),  
384 for SNPs that were variable among Colombian individuals (8,093 sites). We then  
385 parameterized the full (“source\_and target”) SpaceMix model with an MCMC run  
386 comprised of 10 initial exploratory chains (500,000 giteration each), followed by a  
387 500,000,000 iteration “long” run, which was sampled every 10,000 iterations. We  
388 used default prior settings, and centered spatial (i.e. location) priors for each  
389 population at their sampling location. For the two demes composed of individuals  
390 from nearby localities we used the midpoint of the segment connecting both localities  
391 (Fig. S1).

392  
393 SpaceMix models long-distance gene flow between populations in terms of admixture  
394 proportions, which represent the probability that an allele in a given population  
395 migrated recently from a different location of the geo-genetic map. Since leapfrog  
396 distributions can arise through introgressive hybridization between disjunct  
397 populations, we evaluated the evidence for gene flow between distant populations in  
398 our data by comparing the fit of models where admixture proportions were either  
399 fixed to 0 or allowed to vary. We did so by estimating the Bayes Factor (Kass &  
400 Raftery, 1995) between both models using the Savage-Dickey density ratio (Dickey &  
401 Lientz, 1970), which approximates the Bayes Factor between nested models. Further

402 details on this estimator and our implementation for SpaceMix models can be found in  
403 the online supplement.

404

405 Next, we used EEMS (Petkova, Novembre, & Stephens, 2015) to identify areas of the  
406 landscape where gene flow between populations is especially prevalent or reduced.  
407 Briefly, this algorithm estimates the rate at which genetic similarity decays with  
408 distance (i.e. the effective migration). Regions where this decay is quick or slow can  
409 be interpreted as barriers or corridors of migration, respectively. We estimated mean  
410 squared genetic differences between samples from genotype likelihoods in ATLAS  
411 (Link et al., 2017), and used them as input for EEMS. We set the number of demes to  
412 500, and averaged across 10 independent 10,000,000-step MCMC runs logged every  
413 1,000 steps (20% burnin). Since our genetic dissimilarity matrix was inferred from  
414 genotype likelihoods, specifying the number of SNPs used to compute the matrix  
415 (required by EEMS) was not straightforward. We used the number of sites with SNP  
416 p-value below 0.05, as calculated with Angsd (221,825 sites).

417

418 Finally, we assessed how attributes of the landscape influence genetic divergence  
419 between populations. Based on the results of EEMS and SpaceMix analyses, we  
420 evaluated the effect of three landscape features on genetic divergence: geographic  
421 distance, differences in elevation, and the presence of the San Juan River as a  
422 potential corridor of gene flow. To do so, we used the multiple matrix regression with  
423 randomization (MMRR) approach proposed by Wang (2013), which is an extension  
424 of multiple linear regression for distance matrices.

425

426 Our regression model consisted of genetic distance as a response variable and  
427 geographic distance, difference in elevation, and the effect of the San Juan river as a  
428 dispersal corridor as explanatory variables. As a proxy for genetic distance, we used  
429 the linearized genome-wide weighted  $F_{ST}$  ( $F_{ST}/[1-F_{ST}]$ ; J. Reynolds, Weir, &  
430 Cockerham, 1983; Weir & Cockerham, 1984), estimated using Angsd based on 2D-  
431 site frequency spectra (SFS). To maximize the number of sites used to estimate each  
432 SFS, we included contigs with data for less than 20 individuals (but that passed all  
433 other filters) in this analysis. We estimated geodesic distances among populations  
434 based on GPS coordinates taken in the field using the pointDistance() function of the  
435 raster R package (Hijmans, 2017), and calculated elevation differences based on  
436 measurements taken in the field or extracted from Google Earth. To generate a proxy  
437 for the San Juan river as a dispersal corridor we built a resistance layer where every  
438 pixel overlapping the San Juan river had a value of 1 and all others had values of 100,  
439 and used this layer to calculate least cost distances between populations with the  
440 costDistance() function of the gdistance R package (Dijkstra, 1959; van Etten, 2017).  
441 Finally, we regressed the least cost distance against the geodesic distance, and saved  
442 the model residuals as a measure of the component of the resistance distance not  
443 explained by geographic distance. These residuals were used as an explanatory  
444 variable in our model. The MMRR analysis was run using the script archived by  
445 Wang (2013; <https://doi.org/10.5061/dryad.kt71r>) with 10,000 permutations to  
446 estimate p-values.

447

448

## 449 **Results**

450

### 451 *Population structure among Colombian Phyllobates*

452

453 As expected from a multi-species dataset, we found multiple genetically structured  
454 clusters of individuals, which were largely concordant across our exon-enrichment  
455 and mtDNA analyses (Fig. 2, Fig. S2-S3). However, these clusters align much more  
456 closely with geography than either coloration or the current taxonomy: All  
457 populations of *P. terribilis* grouped with the southern populations of *P. aurotaenia*,  
458 while the northeastern populations of *P. aurotaenia* clustered closely with the  
459 northern populations of *P. bicolor*. The southern *P. bicolor* and the *P. aurotaenia*  
460 populations east and west of the Baudó mountains also formed independent clusters,  
461 but their relationship to other lineages was less clear. Finally, two sequences from  
462 captive-bred *P. aurotaenia* of unknown origin (sequenced by Grant et al. [2006] and  
463 Santos et al. [2009]) were sister to those from the southern populations of *P. bicolor*  
464 in our mtDNA genealogy (Fig. 2A). These results highlight the existence of several  
465 previously unrecognized (i.e. cryptic) lineages. Notably, they reveal the existence  
466 three independent solid-yellow lineages, instead of two as previously thought, since  
467 the populations currently classified as *P. bicolor* clustered as two clearly separate and  
468 independent lineages. This points to an even greater discordance between coloration  
469 phenotypes and genetic similarity than previously thought.

470

471 *Phylogenetic relationships and divergence times.*

472

473 The inferred species tree was generally consistent with our genetic structure results,  
474 since tree topologies largely mirrored geography (Fig. 2-3). The three yellow lineages  
475 were recovered as sister to a striped lineage. The topology of the SNAPP tree was  
476 largely concordant with those obtained in mtDNA and Treemix analyses. We only  
477 found inconsistencies in the placement of the *P. aurotaenia* populations from the  
478 eastern and western flanks of the Serranía del Baudó: Mitochondrial haplotypes from  
479 these two populations were part of a closely-related clade that also included all *P.*  
480 *aurotaenia* sequences from the Atrato river. This clade was sister to another one  
481 containing sequences from the northern *P. bicolor* and the (Fig. 2A). Treemix also  
482 recovered the eastern and western Atrato populations as sister taxa, but these two  
483 populations were sister to the rest of the Colombian populations (Fig. 2D and S2).  
484 Finally SNAPP recovered only the western Baudó *P. aurotaenia* as sister to all other  
485 Colombian populations, while the eastern Baudó *P. aurotaenia* was sister to the  
486 southern *P. bicolor* (Fig. 3). Treemix inferred a migration edge from the base of the  
487 clade containing the populations of *P. bicolor* and *P. aurotaenia* from the San Juan  
488 and Atrato drainages into the eastern Baudó *P. aurotaenia* (Fig. 2D). Since Treemix  
489 reconciles instances where a bifurcating tree model, such as the one used by SNAPP,  
490 does not fit the data well by incorporating migration edges between branches of the  
491 tree, this result suggests that these differences may be due to gene flow among  
492 populations.

493

494 Divergence time estimation based on the SNAPP tree revealed a Plio-Pleistocene  
495 diversification of *Phyllobates*, and were generally concordant with previous estimates  
496 (Santos et al., 2009, 2014), indicating that our mutation rate and generation time  
497 assumptions are reasonable. The most recent common ancestor (MRCA) of  
498 *Phyllobates* was placed at 5.1 million years ago (MYA), with subsequent cladogenesis  
499 events from the late Pliocene to the Pleistocene (2.9-0.6 MYA; Fig. 3). These  
500 divergence times were slightly older but within the 95% HPD intervals of those  
501 estimated from mtDNA sequences (Fig. S4).

502

### 503 *Comparative analyses*

504

505 Ancestral state reconstructions found the striped phenotype to be ancestral to solid-  
506 yellow (Fig. 4A). Phylogenetic regressions revealed a strong relationship between  
507 color pattern and size, with solid-yellow lineages being significantly larger than  
508 striped ones (Brownian Motion:  $\beta = 11.95$ ,  $t = 9.92$ ,  $df = 10$ ,  $p = 9.03e-6$ ; Fig. 4A),  
509 but a much weaker relationship between coloration and toxicity (Ornstein–Uhlenbeck:  
510  $\beta = 1.19$ ,  $t = 2.48$ ,  $df = 5$ ,  $p = 0.089$ ; Fig. 4B). These results, suggest that at least two  
511 co-evolving traits (solid yellow coloration and larger size), possibly related to  
512 predator avoidance, are distributed in a leapfrog fashion in *Phyllobates*. Regressions  
513 performed over a set of posterior trees instead of the summary tree resulted in effect  
514 sizes and p-values centered around and qualitatively equivalent to those estimated  
515 using the summary tree, showing that the above conclusions are robust to the  
516 phylogenetic uncertainty present in our species tree reconstruction (Fig. S5).

517

518 *Spatial Population Genetics*

519

520 The effective migration surface estimated by EEMS revealed a clear corridor of  
521 migration that matches the course of the San Juan river to a remarkable degree,  
522 considering that this method is completely agnostic to the topography of the landscape  
523 (Fig. 6A). This corridor connects most of the sampled *P. aurotaenia* populations and  
524 the northern *P. bicolor*, and could explain the discordance between mtDNA and exon  
525 capture datasets in the phylogenetic placement of *P. aurotaenia* populations from the  
526 Eastern and Western Baudó mountains. Concordantly, SpaceMix estimated geo-  
527 genetic locations of populations along the San Juan corridor that were much closer to  
528 one another than their actual geographic positions: *P. aurotaenia* populations from the  
529 upper San Juan and Atrato drainages and the northern *P. bicolor* converged to very  
530 close locations in the upper/mid San Juan, overlapping considerably. The Baudó (east  
531 and west) and southern populations of *P. aurotaenia* were also shifted towards this  
532 area, but to a lesser extent (Fig. 6B).

533

534 In addition EEMS estimated very low levels of migration in the area enclosing the  
535 two southern *P. bicolor* populations, suggesting the existence of barriers to gene flow  
536 around these populations. Interestingly, the geo-genetic location of these populations  
537 was inferred north of its geographic location, past the mid San Juan cluster, and only  
538 slightly overlapping with other populations. The estimated long-distance admixture  
539 proportions were minimal for all populations (Fig. 6C), and the model with these



540 proportions fixed at 0 was overwhelmingly supported over one where they were  
541 allowed to vary (Bayes factor = 1748).

542

543 In agreement with EEMS and SpaceMix results, the MMRR analysis found  
544 significant effects of geographic distance, elevation differences, and the San Juan as a  
545 migration corridor on genetic divergence between localities (Table 1). Geographic  
546 distance was, expectedly, the strongest predictor ( $\beta = 0.64$ ,  $t = 10.05$ ,  $p < 0.00001$ ),  
547 but elevation differences ( $\beta = 0.29$ ,  $t = 4.60$ ,  $p = 0.003$ ), and the San Juan as a barrier  
548 ( $\beta = 0.24$ ,  $t = 4.01$ ,  $p = 0.013$ ) still had appreciable effects on genetic divergence.

549

550

## 551 **Discussion**

552

553 Our main goal for this study was to understand the evolutionary and biogeographic  
554 processes that have shaped the leapfrog distribution of color pattern among  
555 *Phyllobates* populations, focusing on the roles of genetic divergence and gene flow.

556 We found patterns of genetic structure and phylogenetic affinity between populations  
557 that closely match geography, and a strong signal of short-range gene flow, especially  
558 along the San Juan river, together with compelling evidence against gene flow  
559 between distant populations.

560

561

562 These results provide strong evidence against the hypothesis that introgression of  
563 color pattern alleles between disjunct populations has played a role in generating the  
564 geographic distribution of this trait. Instead, they suggest an important role for short-  
565 range gene flow between neighboring populations. The high level of migration among  
566 the central striped populations along the San Juan river suggests that allele movement  
567 between these populations can have a homogenizing effect that maintains their  
568 phenotypic similarity. In addition, we find evidence for a barrier to gene flow that  
569 encloses the two sampled populations of the southern *P. bicolor* lineage, probably  
570 associated with differences in elevation, which could be helping maintain the  
571 phenotypic distinctiveness of this population. Conversely, the northern *P. bicolor*  
572 populations showed a strong signature of gene flow with their neighboring striped  
573 populations, suggesting that other forces, possibly selection, are maintaining the  
574 phenotypic differences between these populations in the face of recurrent gene flow.  
575 Nevertheless, to fully reject or accept these hypotheses, the history the alleles  
576 underlying color pattern differences must be taken into account (Hines et al., 2011).

577

578 Our phylogenetic reconstructions are consistent with a scenario in which the disjunct  
579 solid-yellow populations evolved their color patterns independently. However, the  
580 high levels of gene flow between geographically proximal populations and the close  
581 correspondence between phylogeny and geography lead us to suspect that, at least to  
582 an extent, the recovered phylogenetic relationships are a product of prevalent gene  
583 flow between neighboring populations, and therefore do not reflect the history of  
584 color pattern. A recent simulation study showed that even moderate levels of gene

585 flow between geographic neighbors can confound phylogenetic analyses (James et al.,  
586 2020). This scenario seems especially likely in the case of the northern populations of  
587 *P. bicolor*, given the signature of gene flow with their nearby striped populations (e.g.  
588 the San Juan and Atrato *P. aurotaenia*), but less so in the case of the southern *P.*  
589 *bicolor*, considering the strong barriers to gene flow inferred around the populations  
590 of this lineage. For *P. terribilis* we cannot favor either scenario, since we did not find  
591 strong evidence for or against gene flow with its sister *P. aurotaenia* populations.

592

593 It is therefore plausible that convergent evolution and common ancestry have both  
594 played a role in the origin of this leapfrog distribution. Teasing apart these two  
595 scenarios is challenging if gene flow between neighboring populations is prevalent,  
596 since high levels of genetic exchange between geographically close populations can  
597 erode existing differentiation between them, leading to patterns of  
598 genetic/phylogenetic affinity across the genome that mirror geography, regardless of  
599 their previous history. In the case of leapfrog distributions, this means that, in the face  
600 of persistent gene flow, peripheral populations will be closest to their phenotypically  
601 distinct neighbors, even if their phenotypic similarity stems from common ancestry.  
602 However, admixture between lineages is seldom uniform across the genome, since  
603 selection (see below) can restrict gene flow at certain genomic regions (J. R. Turner,  
604 Johnson, & Eanes, 1979; T. L. Turner, Hahn, & Nuzhdin, 2005; Wu, 2001). Such  
605 regions can therefore preserve historic signatures that have been erased by gene flow  
606 elsewhere in the genome. This is likely to be the case for loci underlying color pattern  
607 variation in *Phylllobates*, especially in cases such as the Northern *P. bicolor*, where

608 phenotypic differences persist in spite of gene flow. Hence, the history of alleles at  
609 these loci should provide unique insights into the history of this phenotype. Future  
610 studies to identify such loci and understand their evolutionary history in relation to  
611 our current results will be instrumental to uncover the demographic processes leading  
612 to the current geographic and phylogenetic distribution of solid-yellow color pattern  
613 in *Phyllobates*, since they will allow for much more explicit tests of the hypotheses  
614 presented here.

615

616 Regardless of whether common ancestry or convergent evolution are at play in this  
617 system, it seems clear that differential selective pressures on the striped and solid-  
618 yellow populations have been involved in the origin and/or maintenance of the  
619 geographic distribution of color patterns. Independent evolution of similar phenotypes  
620 is many times promoted by similar changes in selective regimes (Darwin, 1859; Mayr,  
621 1963; G. G. Simpson, 1953), and selection is required to maintain phenotypic  
622 differences between populations in the face of gene flow (Endler, 1977). Two of the  
623 three solid-yellow lineages (the northern and southern *P. bicolor*) occur at higher  
624 elevations (~600-1000 m.a.s.l.) than the rest of the genus (~0-500 m.a.s.l.). It is  
625 therefore possible that these mid-elevation habitats pose selective pressures (e.g.  
626 predator communities or light environments) different from those of lowland forests,  
627 which favor solid-yellow patterns over striped ones. The many known examples of  
628 variation in coloration across altitudinal gradients lend support to this idea (e.g.  
629 Köhler, Samietz, & Schielzeth, 2017; Rebelo & Siegfried, 1985; Reguera, Zamora-  
630 Camacho, & Moreno-Rueda, 2014; Richmond & Reeder, 2002; Rios & Álvarez-

631 Castañeda, 2007) A similar situation could also be the case with *P. terribilis*, given its  
632 distribution at the southern edge of the genus's range, where it may also experience  
633 different selective pressures from those faced by its closely related striped lineages.

634

635 The nature of color pattern variation in *Phyllobates* (i.e. solid vs striped) suggests that  
636 differential predation pressures may be important for the origin/maintenance of solid-  
637 yellow patterns. In aposematic species, advertisement signals with complex pattern  
638 elements, such as stripes, have been shown to serve a distance-dependent purpose,  
639 acting as conspicuous signals at short distances, while providing camouflage at long  
640 distances (Barnett et al., 2017; Barnett & Cuthill, 2014; Tullberg, Merilaita, &  
641 Wiklund, 2005). In contrast, bright, solid-colored signals remain conspicuous over a  
642 much wider range of distances. For example, a recent study focusing on the poison  
643 frog *Dendrobates tinctorius* found that striped patterns of this species are highly  
644 detectable at close range, but become camouflaged when observed from further away.  
645 Solid-yellow patterns, on the other hand, remained easily detectable over the whole  
646 range of distances tested (Barnett, Michalis, Scott-Samuel, & Cuthill, 2018).  
647 Therefore, it is likely that the striped and solid color patterns represent alternative  
648 aposematic strategies that are advantageous under different environments and/or  
649 predator communities.

650

651 The fact that we find a signature of correlated evolution between size and color  
652 pattern is compatible with this idea, since larger aposematic signals have been shown  
653 to be more detectable and memorable for predators (Forsman & Merilaita, 1999;

654 Gamberale & Tullberg, 1996). Accordingly, size and conspicuousness are positively  
655 correlated among Dendrobatid poison frog species (Hagman & Forsman, 2003; Santos  
656 & Cannatella, 2011). However, we do not find a comparable pattern for toxicity,  
657 which has also been shown to co-vary with conspicuousness in poison frogs (Santos  
658 & Cannatella, 2011; Summers & Clough, 2001). This could be an artifact of low  
659 statistical power, since data are available only for one striped and two plain yellow  
660 Colombian lineages, but we cannot rule out the possibility that toxicity is indeed  
661 comparable between solid and striped populations. Furthermore, considering that  
662 aposematism relies on avoidance learning, it is possible that, despite similar levels of  
663 BTX, solid and striped populations differ in levels of palatability to predators. In any  
664 case, a scenario where solid and striped populations are similarly toxic and/or  
665 palatable is still compatible with predation pressures driving evolutionary  
666 convergence, since all species are, in any case, considerably toxic (Daly et al., 1987;  
667 Myers et al., 1978). However, other explanations, such as geographic variation in  
668 mate preference (R. G. Reynolds & Fitzpatrick, 2007; Summers, Symula, Clough, &  
669 Cronin, 1999; Twomey, Vestergaard, & Summers, 2014; Yang, Richards-Zawacki,  
670 Devar, & Dugas, 2016), could also explain our results and cannot be ruled out.

671

672 It is worth noting, however, that the correlated evolution of body size and color  
673 pattern could also be due to ontogenetic integration (Olson & Miller, 1958). Tadpoles  
674 of all *Phyllobates* species are dark grey, and all of them develop a dorsolateral stripe  
675 shortly before metamorphosis, which remains unchanged until adulthood in striped  
676 lineages. Solid-yellow frogs, on the other hand, gradually lose dark pigmentation,

677 until the solid adult pattern is attained a few months after metamorphosis (Myers et  
678 al., 1978). Therefore it is possible that, for example, the evolution of an extended  
679 growth period could generate changes in both body size and color pattern. If this is the  
680 case, then the concerted evolution of advertisement signal and body size would not  
681 necessarily be evidence of striped and solid patterns representing alternative predator  
682 avoidance strategies.

683

684 Our divergence time estimates indicate that the diversification of *Phyllobates* has  
685 followed the Plio-Pleistocene history of the Central American and the Chocó  
686 bioregions. The first cladogenesis event in our tree, which divides the Central  
687 American and Chocoan taxa was reconstructed between 4.5-5.9 MYA, which  
688 coincides with previously identified increases in faunal migration between Central  
689 and South America at ~6 MYA (Bacon et al., 2015; Santos et al., 2009). Further  
690 branching within South American lineages occurred later than 3 MYA, after both the  
691 Atrato (Duque-Caro, 1990b, 1990a) and Tumaco (Borrero et al., 2012) basins  
692 emerged above sea level to form the current Chocoan landscape. The Pleistocene was  
693 characterized by recurrent climatic and environmental fluctuations, which have been  
694 proposed as major drivers of neotropical rainforest biodiversity (Baker et al., 2020;  
695 Haffer, 1969; Hooghiemstra & Van Der Hammen, 1998; Vanzolini & Williams,  
696 1970). Although the central Chocó has traditionally been regarded as a relatively  
697 stable Pleistocene forest refuge throughout the Quaternary (Gentry, 1982; Haffer,  
698 1967; Hooghiemstra & Van Der Hammen, 1998), a notion supported by multiple  
699 palynological studies (Behling, Hooghiemstra, & Negret, 1998; Berrío, Behling, &

700 Hooghiemstra, 2000; González, Urrego, & Martínez, 2006; Jaramillo & Bayona,  
701 2000; Ramírez & Urrego, 2002; Urrego, Molina, Urrego, & Ramírez, 2006), there is  
702 some evidence of fluctuations in humidity, temperature, fluvial discharge, and sea  
703 level throughout the Quaternary in this region (González et al., 2006; Urrego et al.,  
704 2006). Despite being less dramatic than those experienced by other tropical forests  
705 (e.g. Amazonia), these fluctuations may have promoted periodic retractions of  
706 *Phyllobates* populations towards the San Juan, perhaps resulting in increased rates of  
707 gene flow among them. Future work to understand how climatic fluctuations over the  
708 Quaternary have shaped the distribution of suitable habitat for *Phyllobates* frogs  
709 should shed further light on the biogeographic history of this genus in Northern South  
710 America.

711

712 Finally, our findings have broad implications for the systematics of *Phyllobates*. First  
713 and foremost, this study provides definitive evidence that the populations currently  
714 grouped under *P. aurotaenia* represent multiple independently-evolving lineages,  
715 many of which have probably been reproductively isolated for enough time to warrant  
716 recognition as separate species. Furthermore, we find that *P. bicolor* is comprised of  
717 two well-structured lineages that may have evolved similar phenotypes independently.  
718 Third, we find highly variable levels of mtDNA divergence within *P. lugubris* (0-4%  
719 16S, 0.2-8% COI, and 0-5.7% Cytb uncorrected p-distances), which could also be due  
720 to the existence of cryptic species.

721



722 It is, therefore, evident that a thorough revision of *Phyllobates* systematics is  
723 warranted. At this point, however, we refrain from modifying the group's current  
724 taxonomy for several reasons. First, our results clearly illustrate that, as previously  
725 suggested (Grant et al., 2006; Myers & Daly, 1976), coloration alone is not effective  
726 for diagnosing species of Dendrobatid frogs. Therefore, integrating multiple lines of  
727 evidence (e.g. coloration, genetic variation, alkaloid profiles, bioacoustic data, larval  
728 and adult morphology) is needed to disentangle species limits. Second, although our  
729 study represents a substantial increase in geographic sampling, there are still  
730 considerable gaps, such as the lower San Juan drainage, or the mid-elevation forests  
731 south of the distribution of *P. bicolor*, that need to be considered. The fact that the two  
732 captive-bred *P. aurotaenia* included in mtDNA analyses are sister to the southern *P.*  
733 *bicolor* (Fig. 2A) suggests that we have not yet sampled the full diversity of  
734 *Phyllobates* lineages in Colombia. Finally the holotype of *P. aurotaenia* was collected  
735 in Condoto, Chocó, which is considerably distant from any of our sampling localities  
736 (Fig. S6), and the type locality of *P. bicolor* is unknown (Myers et al., 1978). This  
737 situation poses nomenclature issues, since, even if a robust species delimitation were  
738 available, naming these species would not be straightforward until the type specimens  
739 of *P. bicolor* and *P. aurotaenia* can be confidently assigned to one of them. Further  
740 work with increased sampling, including type specimens, and integrating multiple  
741 lines of evidence is therefore still needed to generate a taxonomy for *Phyllobates* that  
742 more accurately represents the genus's evolutionary history.

743

744

745 **Concluding remarks**

746

747 Leapfrog distributions constitute geographic replicates for the occurrence of a  
748 phenotype, and therefore provide important information about the origins of  
749 phenotypic diversity among closely related lineages. Here we show that, despite  
750 marked genetic structure and differentiation, there is considerable gene flow between  
751 phenotypically similar populations at the center of a poison-dart frog leapfrog  
752 distribution. This has probably been important for the origin and maintenance of the  
753 geographic distribution of color patterns in this group. Furthermore, we found  
754 instances of both reduced and increased levels of gene flow between neighboring  
755 populations with different phenotypes, suggesting that in some cases reduced gene  
756 exchange can contribute to the maintenance of phenotypic differences between  
757 populations in a leapfrog distribution, while in others these differences actually persist  
758 in the face of gene flow, probably due to local adaptation of different forms.

759

760 However, we are unable to answer a commonly addressed question about leapfrog  
761 distributions: whether phenotypic differences between populations stem from  
762 common ancestry or independent evolution. Even though our phylogenetic  
763 reconstructions unambiguously suggest the latter on their own, our finding of  
764 extensive gene flow among neighboring populations casts doubt on this conclusion.  
765 Several other studies on the history of leapfrog distributions have obtained similar  
766 phylogenies that align with geography instead of phenotypic similarity (Cadena et al.,  
767 2010; Garcia-Moreno & Fjeldså, 1999; Norman et al., 2002; Quek et al., 2010; Toon,

768 Austin, Dolman, Pedler, & Joseph, 2012), leading to the view that leapfrog  
769 distributions are often due to independent evolution. Our results, therefore, add to the  
770 notion that alternative explanations such as pervasive gene flow (Hines et al.,  
771 2011) or incomplete lineage sorting (Avice & Robinson, 2008) can decouple the  
772 history of phenotypic change at a given trait from genome-wide patterns of  
773 divergence, possibly leading to erroneous inferences of convergent evolution (Hahn &  
774 Nakhleh, 2015).

775

#### 776 **Data accessibility**

777

778 mtDNA sequences were uploaded to GenBank under accessions XXX-YYY (**To be**  
779 **added upon acceptance**), and raw Illumina reads were uploaded to the NCBI SRA  
780 under accession zzzz. The assemblies, bam, and vcf files, and body size data, as well  
781 as the code used for analyses are available on the DRYAD repository (**Citation to be**  
782 **added upon acceptance**) or as supplementary material.

783

#### 784 **Acknowledgements**

785

786 We thank Pablo Palacios-Rodríguez, José Alfredo Hernández, Carolina Esquivel,  
787 Diana Galindo, Mabel González, and Fernando Vargas-Salinas for assistance in the  
788 field, Lydia Smith, Valeria Ramírez-Castañeda, Alvaro Hernández, and Ke Bi for help  
789 with molecular and bioinformatic procedures, Andrea Paz for advice on MMRR  
790 analyses, and Alan Resetar (FMNH), Andrew Crawford and Alberto Farfán

791 (ANDES), Rayna Bell and Addison Wynn (USNM), Andrés Acosta and Carlos  
792 Montaña (IAvH), John Taylor Rengifo (UTCh), Greg Schneider (UMMZ), and David  
793 Kizirian (AMNH) for facilitating access to preserved specimens. Comments and  
794 suggestions from Trevor Price, John Novembre, Valentina Gómez-Bahamon, John  
795 Bates, Daniel Matute, the Bates/Hackett lab, the Kronforst lab, and two anonymous  
796 reviewers greatly improved this paper. We sincerely thank Lina M. Arenas for  
797 allowing us to use her beautiful frog illustrations for our figures. This work was  
798 funded by a Basic Sciences Grant from the Vice Chancellor of Research at  
799 Universidad de los Andes, a Colombia Biodiversa Scholarship from the Alejandro  
800 Angel Escobar foundation, a Pew Biomedical Scholarship, Neubauer Family funds  
801 and a Steiner Award from the Univeristy of Chicago, and NSF grant DEB-1655336.  
802 RM was partially supported by a Fellowship for Young Researchers and Innovators  
803 (Otto de Greiff) from COLCIENCIAS. Computations were performed on the  
804 University of Chicago's Gardner HPC cluster, funded by NIH grant TR000430.  
805 Tissue collections were authorized by permits No. 2194 and 1380 from the Colombian  
806 Ministry of Environment and Authority for Environmental Licenses (ANLA).

807

#### 808 **Author contributions**

809

810 R.M., A.A., and M.R.K. conceived the project, R.M., T.P.L, R.N., M.R.K, and A.A.  
811 designed the research, R.M., A.A., R.N. and M.R.K. acquired funding, A.A., D.M-V.,  
812 and R.M. collected samples, R.M. and T.P.L. generated the data, and R.M. analyzed  
813 the data and wrote the paper with input from M.K. and edits from all authors.

814

815 **Supplementary information**

816

817 **Supplementary note.** Criteria used to select Operational Taxonomic Units (OTUs)  
818 for phylogenetic inference with SNAPP.

819 **Table S1.** Information and accession numbers for samples used in this study. Locality  
820 data is limited to prevent illegal traffic. Further details are available from the authors  
821 upon request.

822 **Table S2.** Results of likelihood ratio tests performed on Treemix analyses run with  $m$   
823 = 0-6 migration edges.

824 **Table S3.** Information and snout-to-vent lengths of museum specimens measured for  
825 comparative analyses.

826

827 **Figure S1.** Localities joined into a single deme for locality-level analyses.

828 **Figure S2.** Results of Treemix analyses run with  $m=0-6$  migration edges.

829 **Figure S3.** Minimum-evolution tree based on genetic distances.

830 **Figure S4.** Mitochondrial DNA time tree inferred using BEAST 2.

831 **Figure S5.** Results of phylogenetic comparative analyses run on 1000 randomly-  
832 drawn trees from the SNAPP posterior tree distribution.

833 **Figure S6.** Map of the type locality of *P. aurotaenia*.

834 **Figure S7-S8 and associated text.** Details on our implementation of the Savage-  
835 Dickey ratio to estimate Bayes Factors between nested SpaceMix models.

836

837 **Tables**

838

839 Table 1. Results from the multiple matrix regression with randomization (MMRR)

840 analysis. P-values were estimated using 10,000 permutations.

| <b>Predictor</b>                     | <b>Coefficient</b> | <b>t-statistic</b> | <b>p-value</b> |
|--------------------------------------|--------------------|--------------------|----------------|
| Intercept                            | 0.0325             | 0.5286             | 1.00000        |
| Geodesic Distance                    | 0.6419             | 10.0547            | < 0.00001      |
| San Juan LC Distance                 | 0.2386             | 4.0094             | 0.01370        |
| Elevation Difference                 | 0.2886             | 4.5994             | 0.00320        |
| $r^2 = 0.62, F = 48.13, p < 0.00001$ |                    |                    |                |

841

842 **Figures**

843

A.

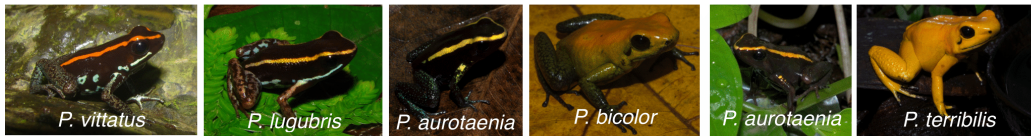

B.

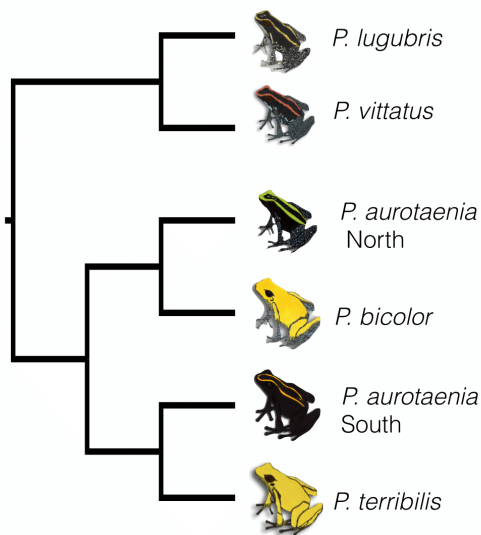

C.

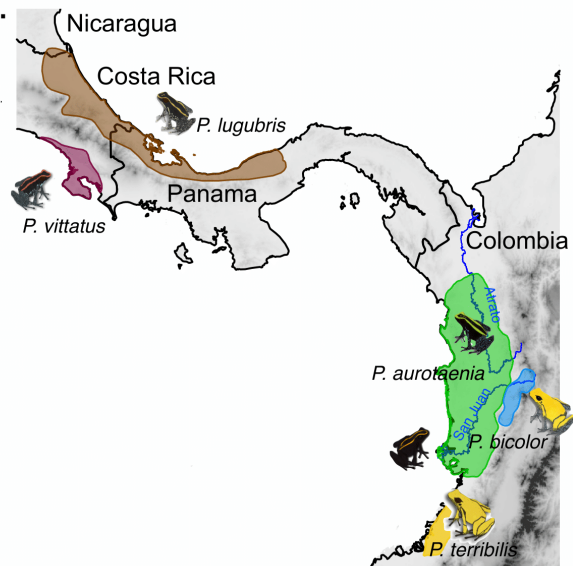

845

846 **Fig 1.** A) Color pattern diversity, B) geographic distribution, and C) currently  
847 accepted phylogenetic relationships of *Phyllobates* poison frogs (Grant et al., 2017).

848 Species distribution polygons were obtained from the IUCN red list of threatened  
849 species website (<https://www.iucnredlist.org/>) and modified to fit natural history  
850 collection records and our own observations.

851

852

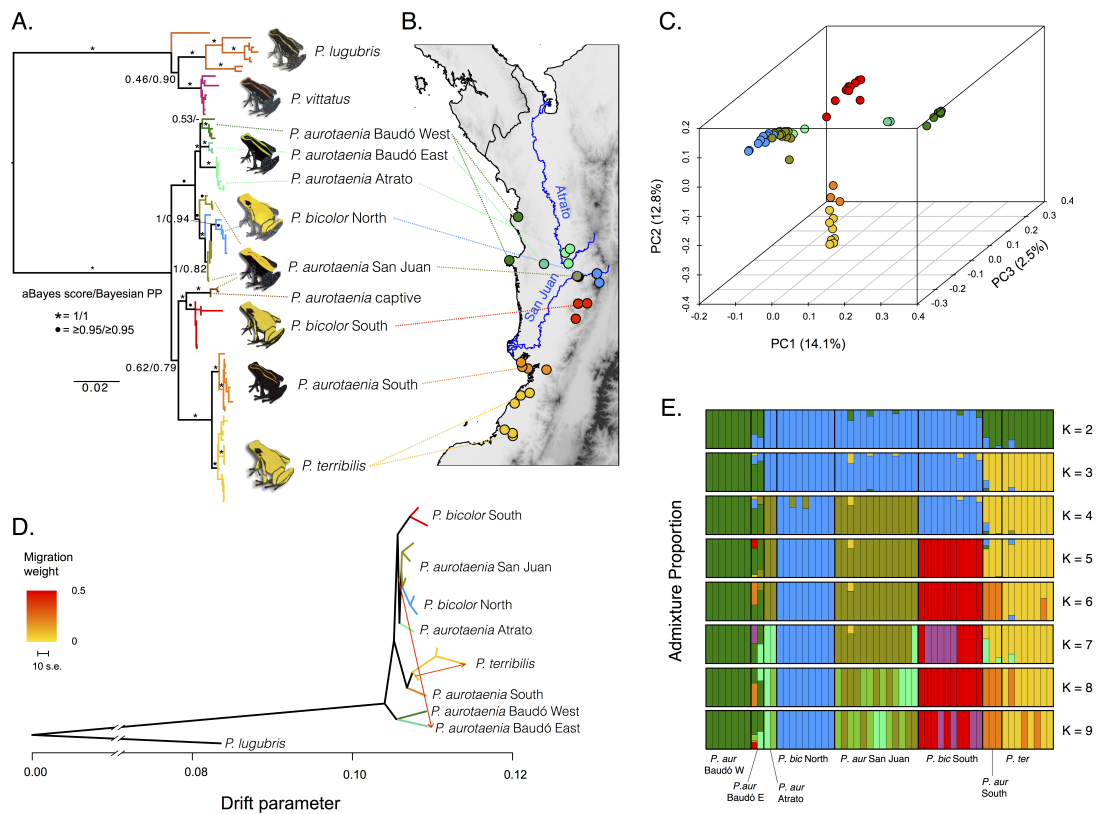

854

855 **Fig 2.** Genetic structure among *Phyllobates* populations in western Colombia. A)  
 856 Maximum likelihood mtDNA genealogy inferred from 1926bp. B) Sampling localities  
 857 for this study. C) Principal component analysis plot based on the first three  
 858 components accounting for 29.4% of the variance. D) Treemix population graph  
 859 assuming 2 migration edges. E) Individual admixture proportions assuming 2-9  
 860 ancestral populations. Colors in A-D correspond to the operational taxonomic units  
 861 (OTU) used for phylogenetic analyses. Colors in E were chosen to loosely represent  
 862 these clusters.  
 863



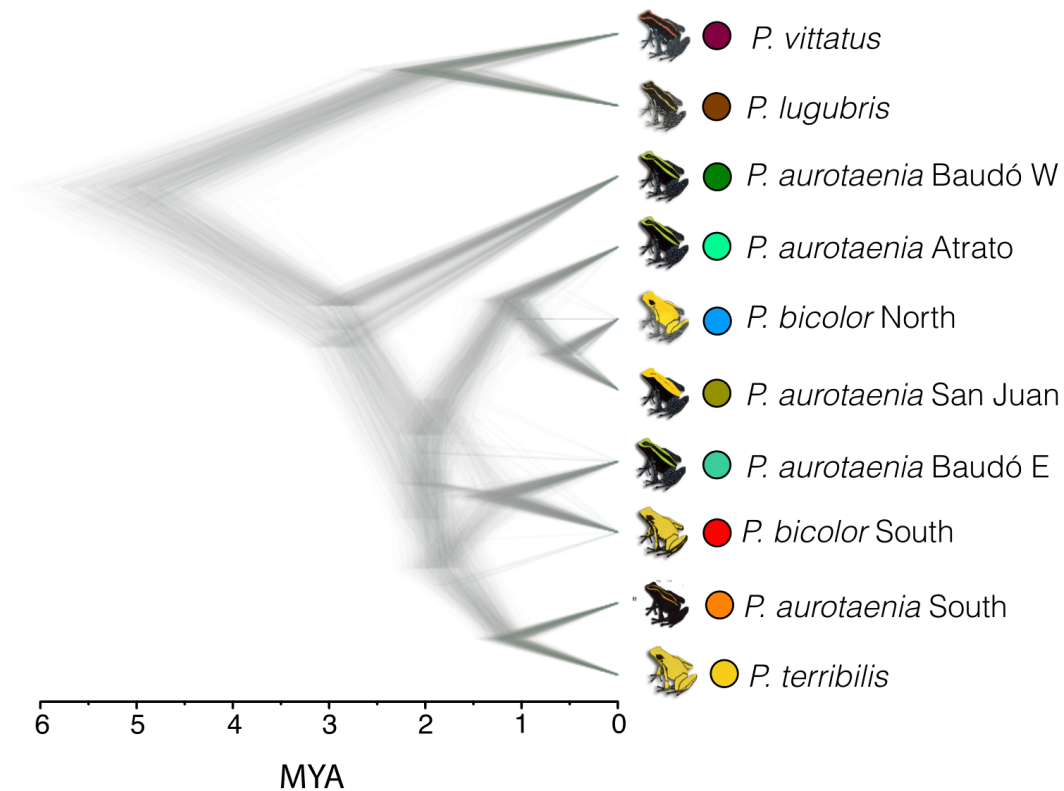

865 **Fig. 3** Phylogenetic relationships and divergence times among *Phyllobates* lineages  
866 inferred using SNAPP. Divergence times assume a mutation rate of  $10^{-9}$  mutations per  
867 year and a generation time of one year. Each individual tree represents a sample from  
868 the posterior distribution, and clades present in more samples have higher posterior  
869 probabilities. A maximum clade credibility tree derived from this distribution is  
870 displayed on Fig. 4A. Colors are as in Fig. 2.  
871

872

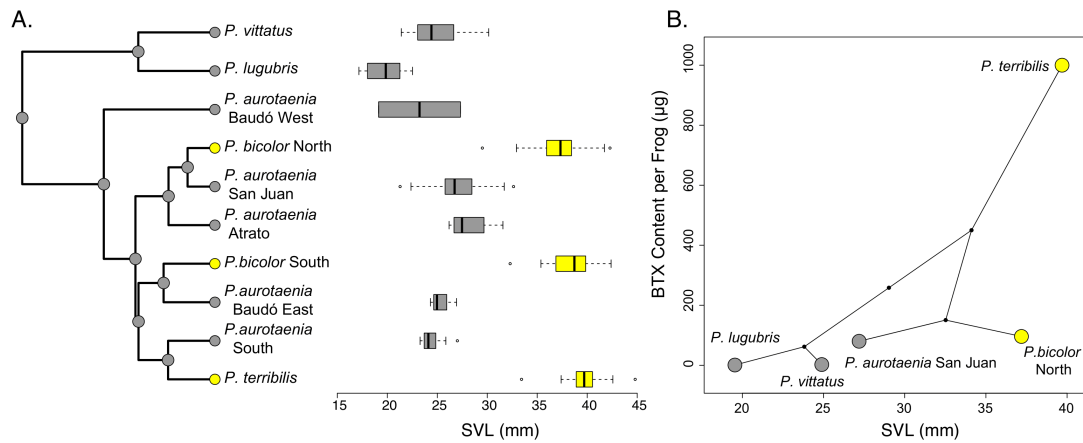

874 **Fig. 4** Evolutionary patterns of body size, color pattern, and toxicity in *Phyllobates*.

875 A) Maximum clade credibility tree derived from the SNAPP posterior distribution  
876 and phylogenetic distribution of color pattern and snout-to-vent length (SVL) values  
877 among lineages. B) Phylogenetic biplot depicting the relationship between mean SVL  
878 and mean batrachotoxin concentration. Grey boxes/points represent striped lineages  
879 while yellow ones represent solid-yellow lineages.

880

881

882

883

884

885

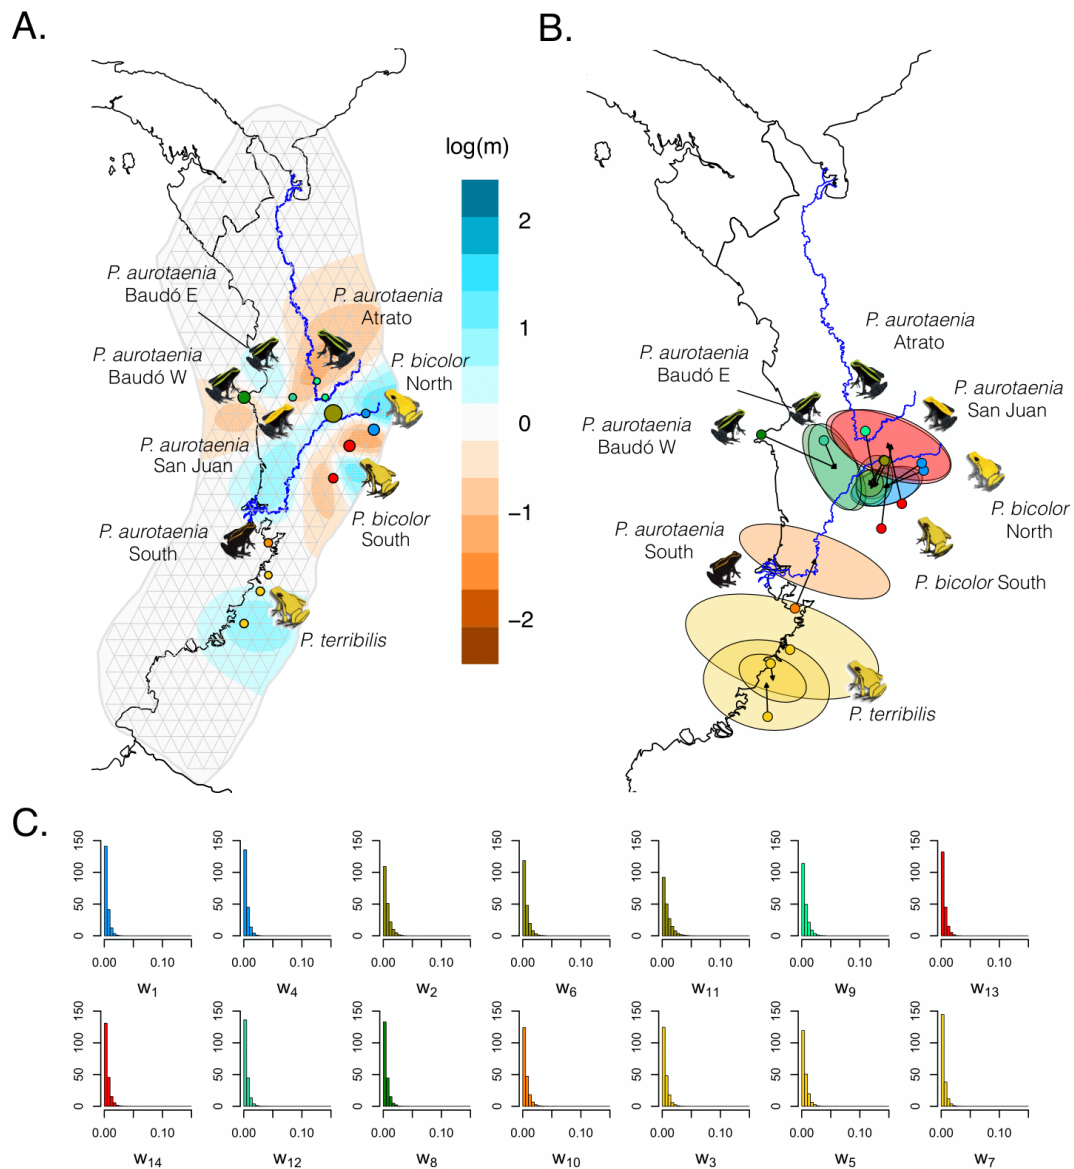

887 **Fig. 5** Gene flow among *Phyllobates* species across Western Colombia. A) Effective  
888 migration surface estimated using EEMS. Cyan and brown areas of the map are those  
889 where migration between demes is higher (cyan) or lower (brown) than expected  
890 under isolation by distance. Grey lines depict the population grid and habitat outline  
891 used by EEMS. B) Geogenetic map inferred with SpaceMix. Ellipses represent the

892 95% Bayesian credible intervals around each population's geogenetic location, and  
893 colored dots represent actual sampling locations. Arrows connect sampling and  
894 geogenetic locations. C) Posterior distributions of the admixture proportion  
895 parameters from the SpaceMix model for each population. Histograms, points, and  
896 ellipses are colored by OTU as in Fig. 2.

897

898

899

900 **References**

- 901 Altekar, G., Dwarkadas, S., Huelsenbeck, J. P., & Ronquist, F. (2004). Parallel  
902 Metropolis coupled Markov chain Monte Carlo for Bayesian phylogenetic  
903 inference. *Bioinformatics*, *20*(3), 407–415. doi:10.1093/bioinformatics/btg427
- 904 Altschul, S. (1997). Gapped BLAST and PSI-BLAST: a new generation of protein  
905 database search programs. *Nucleic Acids Research*, *25*(17), 3389–3402.  
906 doi:10.1093/nar/25.17.3389
- 907 Anisimova, M., Gil, M., Dufayard, J. F., Dessimoz, C., & Gascuel, O. (2011). Survey  
908 of branch support methods demonstrates accuracy, power, and robustness of fast  
909 likelihood-based approximation schemes. *Systematic Biology*, *60*(5), 685–699.  
910 doi:10.1093/sysbio/syr041
- 911 Avise, J. C., & Robinson, T. J. (2008). Hemiplasy: A new term in the lexicon of  
912 phylogenetics. *Systematic Biology*, *57*(3), 503–507.  
913 doi:10.1080/10635150802164587
- 914 Bacon, C. D., Silvestro, D., Jaramillo, C., Smith, B. T., Chakrabarty, P., & Antonelli,  
915 A. (2015). Biological evidence supports an early and complex emergence of the  
916 Isthmus of Panama. *Proceedings of the National Academy of Sciences of the*  
917 *United States of America*, *112*(19), 6110–6115. doi:10.1073/pnas.1423853112
- 918 Baker, P. A., Fritz, S. C., Battisti, D. S., Dick, C. W., Vargas, O. M., Asner, G. P., ...  
919 Prates, I. (2020). Beyond Refugia: New insights on Quaternary climate variation  
920 and the evolution of biotic diversity in tropical South America. In V. Rull & A.  
921 C. Carnaval (Eds.), *Neotropical Diversification: Patterns and Processes*. Berlin:  
922 Springer. doi:10.1007/978-3-030-31167-4
- 923 Barnett, J. B., & Cuthill, I. C. (2014). Distance-dependent defensive coloration.  
924 *Current Biology*, *24*(24), R1157–R1158. doi:10.1016/j.cub.2014.11.015
- 925 Barnett, J. B., Michalis, C., Scott-Samuel, N. E., & Cuthill, I. C. (2018). Distance-  
926 dependent defensive coloration in the poison frog *Dendrobates tinctorius*,  
927 *Dendrobatidae*. *Proceedings of the National Academy of Sciences of the United*  
928 *States of America*, *115*(25), 6416–6421. doi:10.1073/pnas.1800826115
- 929 Barnett, J. B., Redfern, A. S., Bhattacharyya-Dickson, R., Clifton, O., Courty, T., Ho,  
930 T., ... Cuthill, I. C. (2017). Stripes for warning and stripes for hiding: Spatial  
931 frequency and detection distance. *Behavioral Ecology*, *28*(2), 373–381.  
932 doi:10.1093/beheco/arw168

- 933 Behling, H., Hooghiemstra, H., & Negret, A. J. (1998). Holocene history of the Chocó  
934 rain forest from Laguna Piusbi, southern Pacific lowlands of Colombia.  
935 *Quaternary Research*, *50*(3), 300–308. doi:10.1006/qres.1998.1998
- 936 Berrío, J. C., Behling, H., & Hooghiemstra, H. (2000). Tropical rain-forest history  
937 from the Colombian Pacific area: A 4200-year pollen record from Laguna  
938 Jotaordó. *Holocene*, *10*(6), 749–756. doi:10.1191/09596830094999
- 939 Bi, K., Vanderpool, D., Singhal, S., Linderoth, T., Moritz, C., & Good, J. M. (2012).  
940 Transcriptome-based exon capture enables highly cost-effective comparative  
941 genomic data collection at moderate evolutionary scales. *BMC Genomics*, *13*(1),  
942 403. doi:10.1186/1471-2164-13-403
- 943 Bolger, A. M., Lohse, M., & Usadel, B. (2014). Trimmomatic: A flexible trimmer for  
944 Illumina sequence data. *Bioinformatics*, *30*(15), 2114–2120.  
945 doi:10.1093/bioinformatics/btu170
- 946 Borrero, C., Pardo, A., Jaramillo, C. M., Osorio, J. A., Cardona, A., Flores, A., ...  
947 Castillo, H. (2012). Tectonostratigraphy of the Cenozoic Tumaco forearc basin  
948 (Colombian Pacific) and its relationship with the northern Andes orogenic build  
949 up. *Journal of South American Earth Sciences*, *39*, 75–92.  
950 doi:10.1016/j.jsames.2012.04.004
- 951 Bouckaert, R., Vaughan, T. G., Barido-Sottani, J., Duchêne, S., Fourment, M.,  
952 Gavryushkina, A., ... Drummond, A. J. (2019). BEAST 2.5: An advanced  
953 software platform for Bayesian evolutionary analysis. *PLoS Computational  
954 Biology*, *15*(4), e1006650. doi:10.1371/journal.pcbi.1006650
- 955 Bradburd, G. S., Ralph, P. L., & Coop, G. M. (2016). A spatial framework for  
956 understanding population structure and admixture. *PLoS Genetics*, *12*(1), 1–38.  
957 doi:10.1371/journal.pgen.1005703
- 958 Brower, A. V. Z. (1996). Parallel race formation and the evolution of mimicry in  
959 *Heliconius* butterflies : A phylogenetic hypothesis from mitochondrial DNA  
960 sequences. *Evolution*, *50*(1), 195–221. doi:10.2307/2410794
- 961 Bryant, D., Bouckaert, R., Felsenstein, J., Rosenberg, N. A., & RoyChoudhury, A.  
962 (2012). Inferring species trees directly from biallelic genetic markers: Bypassing  
963 gene trees in a full coalescent analysis. *Molecular Biology and Evolution*, *29*(8),  
964 1917–1932. doi:10.1093/molbev/mss086
- 965 Cadena, C. D., Cheviron, Z. A., & Funk, W. C. (2010). Testing the molecular and  
966 evolutionary causes of a ‘leapfrog’ pattern of geographical variation in

- 967 coloration. *Journal of Evolutionary Biology*, 24(2), 402–414.  
968 doi:10.1111/j.1420-9101.2010.02175.x
- 969 Chapman, F. M. (1923). Mutation among birds on the genus *Buarremon*. *Bulletin of*  
970 *the American Museum of Natural History*, 48, 243–278.
- 971 Che, J., Chen, H.-M., Yang, J.-Xi., Jin, J.-Q., Jiang, K., Yuan, Z.-Y., ... Zhang, Y.-P.  
972 (2012). Universal COI primers for DNA barcoding amphibians. *Molecular*  
973 *Ecology Resources*, 12(2), 247–258. doi:10.1111/j.1755-0998.2011.03090.x
- 974 Crawford, A. J. (2003). Relative rates of nucleotide substitution in frogs. *Journal of*  
975 *Molecular Evolution*, 57(6), 636–641. doi:10.1007/s00239-003-2513-7
- 976 Daly, J. W., Myers, C. W., & Whittaker, N. (1987). Further classification of skin  
977 alkaloids from neotropical poison frogs (Dendrobatidae), with a general survey  
978 of toxic/noxious substances in the Amphibia. *Toxicon*, 25(10), 1023–1095.  
979 doi:10.1016/0041-0101(87)90265-0
- 980 Darwin, C. (1859). *On the origin of species, by means of natural selection; or, The*  
981 *preservation of favoured races in the struggle for life*. London: John Murray.
- 982 Dickey, J. M., & Lientz, B. P. (1970). The weighted likelihood ratio, sharp hypotheses  
983 about chances, the order of a Markov chain. *The Annals of Mathematical*  
984 *Statistics*, 41(1), 214–226. doi:10.1214/aoms/1177697203
- 985 Dijkstra, E. W. (1959). A note on two problems in connexion with graphs.  
986 *Numerische Mathematik*, 1(1), 269–271. doi:10.1007/BF01386390
- 987 Duque-Caro, J. H. (1990a). Neogene stratigraphy, paleoceanography and  
988 paleobiogeography in northwest South America and the evolution of the Panama  
989 seaway. *Palaeogeography, Palaeoclimatology, Palaeoecology*, 77(3–4), 203–  
990 234. doi:10.1016/0031-0182(90)90178-A
- 991 Duque-Caro, J. H. (1990b). The Chocó block in the northwestern corner of South  
992 America: Structural, tectonostratigraphic, and paleogeographic implications.  
993 *Journal of South American Earth Sciences*, 3(1), 71–84. doi:10.1016/0895-  
994 9811(90)90019-W
- 995 Edgar, R. C. (2004). MUSCLE: multiple sequence alignment with high accuracy and  
996 high throughput. *Nucleic Acids Research*, 32(5), 1792–1797.  
997 doi:10.1093/nar/gkh340
- 998 Emsley, M. G. (1965). The geographical distribution of the color-pattern components  
999 of *Heliconius erato* and *Heliconius melpomene* with genetical evidence for the  
1000 systematic relationship between the two species. *Zoologica*, 49(15), 245–286.



- 1001 Endler, J. A. (1977). *Geographic Variation, Speciation, and Clines*. *Monographs In*  
1002 *Population Biology*. Princeton: Princeton University Press.
- 1003 Fitch, W. M. (1971). Toward defining the course of evolution: Minimum change for a  
1004 specific tree topology. *Systematic Zoology*, 20(4), 406. doi:10.2307/2412116
- 1005 Forsman, A., & Merilaita, S. (1999). Fearful symmetry: pattern size and asymmetry  
1006 affects aposematic signal efficacy. *Evolutionary Ecology*, 13(2), 131–140.  
1007 doi:10.1023/A:1006630911975
- 1008 Fu, L., Niu, B., Zhu, Z., Wu, S., & Li, W. (2012). CD-HIT: Accelerated for clustering  
1009 the next-generation sequencing data. *Bioinformatics*, 28(23), 3150–3152.  
1010 doi:10.1093/bioinformatics/bts565
- 1011 Gamberale, G., & Tullberg, B. S. (1996). Evidence for a Peak-Shift in Predator  
1012 Generalization among Aposematic Prey. *Proceedings of the Royal Society B:*  
1013 *Biological Sciences*, 263(1375), 1329–1334. doi:10.1098/rspb.1996.0195
- 1014 Garcia-Moreno, J., & Fjeldså, J. (1999). Re-evaluation of species limits in the genus  
1015 *Atlapetes* based on mtDNA sequence data. *Ibis*, 141(2), 199–207.  
1016 doi:10.1111/j.1474-919X.1999.tb07542.x
- 1017 Gentry, A. H. (1982). Phytogeographic patterns as evidence for a Chocó refuge. In G.  
1018 T. Prance (Ed.), *Biological Diversification in the Tropics* (pp. 112–136). New  
1019 York: Plenum Press.
- 1020 González, C., Urrego, L. E., & Martínez, J. I. (2006). Late Quaternary vegetation and  
1021 climate change in the Panama Basin: Palynological evidence from marine cores  
1022 ODP 677B and TR 163-38. *Palaeogeography, Palaeoclimatology,*  
1023 *Palaeoecology*, 234(1), 62–80. doi:10.1016/j.palaeo.2005.10.019
- 1024 Grabherr, M. G., Haas, B. J., Yassour, M., Levin, J. Z., Thompson, D. a, Amit, I., ...  
1025 Regev, A. (2011). Full-length transcriptome assembly from RNA-Seq data  
1026 without a reference genome. *Nature Biotechnology*, 29(7), 644–652.  
1027 doi:10.1038/nbt.1883
- 1028 Grafen, A. (1989). The Phylogenetic Regression. *Philosophical Transactions of the*  
1029 *Royal Society B: Biological Sciences*, 326(1233), 119–157.  
1030 doi:10.1098/rstb.1989.0106
- 1031 Grant, T., Frost, D. R., Caldwell, J. P., Gagliardo, R., Haddad, C. F. B., Kok, P. J. R.,  
1032 ... Wheeler, W. C. (2006). Phylogenetic systematics of dart-poison frogs and  
1033 their relatives (Amphibia: Athesphatanura: Dendrobatidae). *Bulletin of the*



- 1034 *American Museum of Natural History*, 299, 1–262. doi:10.1206/0003-  
1035 0090(2006)299[1:PSODFA]2.0.CO;2
- 1036 Grant, T., Rada, M., Anganoy-Criollo, M., Batista, A., Dias, P. H., Jeckel, A. M., ...  
1037 Rueda-Almonacid, J. V. (2017). Phylogenetic systematics of Dart-Poison frogs  
1038 and their relatives revisited (Anura: Dendrobatoidea). *South American Journal of*  
1039 *Herpetology*, 12(s1), S1–S90.
- 1040 Guindon, S., Dufayard, J. F., Lefort, V., Anisimova, M., Hordijk, W., & Gascuel, O.  
1041 (2010). New algorithms and methods to estimate maximum-likelihood  
1042 phylogenies: Assessing the performance of PhyML 3.0. *Systematic Biology*,  
1043 59(3), 307–321. doi:10.1093/sysbio/syq010
- 1044 Haffer, J. (1967). Speciation in Colombian forest birds west of the Andes. *American*  
1045 *Museum Novitates*, 2294, 1–57.
- 1046 Haffer, J. (1969). Speciation in Amazonian Forest Birds. *Science*, 165(3889), 131–  
1047 137. doi:10.1126/science.165.3889.131
- 1048 Hagman, M., & Forsman, A. (2003). Correlated evolution of conspicuous coloration  
1049 and body size in poison frogs (Dendrobatidae). *Evolution*, 57(12), 2904–2910.  
1050 doi:10.1111/j.0014-3820.2003.tb01531.x
- 1051 Hahn, M. W., & Nakhleh, L. (2015). Irrational exuberance for resolved species trees.  
1052 *Evolution*, 70(1), 7–17. doi:10.1111/evo.12832
- 1053 Hijmans, R. J. (2017). raster: Geographic Data Analysis and Modeling. *R Package*  
1054 *Version 2.6-7*.
- 1055 Hines, H. M., Counterman, B. A., Papa, R., Albuquerque de Moura, P., Cardoso, M.  
1056 Z., Linares, M., ... McMillan, W. O. (2011). Wing patterning gene redefines the  
1057 mimetic history of *Heliconius* butterflies. *Proceedings of the National Academy*  
1058 *of Sciences of the United States of America*. doi:10.1073/pnas.1110096108
- 1059 Hodges, E., Rooks, M., Xuan, Z., Bhattacharjee, A., Benjamin Gordon, D., Brizuela,  
1060 L., ... Hannon, G. J. (2009). Hybrid selection of discrete genomic intervals on  
1061 custom-designed microarrays for massively parallel sequencing. *Nature*  
1062 *Protocols*, 4(6), 960–974. doi:10.1038/nprot.2009.68
- 1063 Hodges, E., Xuan, Z., Baliya, V., Kramer, M., Molla, M. N., Smith, S. W., ...  
1064 McCombie, W. R. (2007). Genome-wide in situ exon capture for selective  
1065 resequencing. *Nature Genetics*, 39(12), 1522–1527. doi:10.1038/ng.2007.42
- 1066 Hooghiemstra, H., & Van Der Hammen, T. (1998). Neogene and Quaternary  
1067 development of the neotropical rain forest: The forest refugia hypothesis, and a

- 1068 literature overview. *Earth Science Reviews*, 44(3–4), 147–183.  
1069 doi:10.1016/S0012-8252(98)00027-0
- 1070 Hovanitz, W. (1940). Ecological color variation in a butterfly and the problem of  
1071 “protective coloration.” *Ecology*, 21(3), 371–380. doi:10.2307/1930846
- 1072 Huang, X. Q., & Madan, A. (1999). CAP3: A DNA sequence assembly program.  
1073 *Genome Research*, 9(9), 868–877. Retrieved from  
1074 <http://sequoia.ucmerced.edu/SymBioSys/index.php>
- 1075 Huxley, J. S. (1942). *Evolution The Modern Synthesis*. New York City: Harper and  
1076 Brothers.
- 1077 James, M. E., Arenas-Castro, H., Groh, J. S., Engelstaedter, J., & Ortiz-Barrientos, D.  
1078 (2020). Highly replicated evolution of parapatric ecotypes. *BioRxiv*,  
1079 2020.02.05.936401. doi:10.1101/2020.02.05.936401
- 1080 Jaramillo, C., & Bayona, G. (2000). Mangrove distribution during the Holocene in  
1081 Tribugá Gulf, Colombia. *Biotropica*, 32(1), 14. doi:10.1646/0006-  
1082 3606(2000)032[0014:mddthi]2.0.co;2
- 1083 Jiang, H., Lei, R., Ding, S. W., & Zhu, S. (2014). Skewer: A fast and accurate adapter  
1084 trimmer for next-generation sequencing paired-end reads. *BMC Bioinformatics*,  
1085 15(1), 1–12. doi:10.1186/1471-2105-15-182
- 1086 Kass, R. E., & Raftery, A. E. (1995). Bayes factors. *Journal of the American*  
1087 *Statistical Association*, 90(430), 773–795.  
1088 doi:10.1080/01621459.1995.10476572
- 1089 Kearse, M., Moir, R., Wilson, A., Stones-Havas, S., Cheung, M., Sturrock, S., ...  
1090 Drummond, A. (2012). Geneious Basic: An integrated and extendable desktop  
1091 software platform for the organization and analysis of sequence data.  
1092 *Bioinformatics*, 28(12), 1647–1649. doi:10.1093/bioinformatics/bts199
- 1093 Köhler, G., Samietz, J., & Schielzeth, H. (2017). Morphological and colour morph  
1094 clines along an altitudinal gradient in the meadow grasshopper  
1095 *Pseudochorthippus parallelus*. *PLoS ONE*, 12(12), 1–13.  
1096 doi:10.1371/journal.pone.0189815
- 1097 Korneliussen, T. S., Albrechtsen, A., & Nielsen, R. (2014). ANGSD: Analysis of next  
1098 generation sequencing data. *BMC Bioinformatics*, 15(1), 1–13.  
1099 doi:10.1186/s12859-014-0356-4
- 1100 Lanfear, R., Frandsen, P. B., Wright, A. M., Senfeld, T., & Calcott, B. (2017).  
1101 Partitionfinder 2: New methods for selecting partitioned models of evolution for

- 1102 molecular and morphological phylogenetic analyses. *Molecular Biology and*  
1103 *Evolution*, 34(3), 772–773. doi:10.1093/molbev/msw260
- 1104 Langmead, B., & Salzberg, S. L. (2012). Fast gapped-read alignment with Bowtie 2.  
1105 *Nature Methods*, 9(4), 357–359. doi:10.1038/nmeth.1923
- 1106 Lefort, V., Desper, R., & Gascuel, O. (2015). FastME 2.0: A comprehensive,  
1107 accurate, and fast distance-based phylogeny inference program. *Molecular*  
1108 *Biology and Evolution*, 32(10), 2798–2800. doi:10.1093/molbev/msv150
- 1109 Li, H., Handsaker, B., Wysoker, A., Fennell, T., Ruan, J., Homer, N., ... Durbin, R.  
1110 (2009). The Sequence Alignment/Map format and SAMtools. *Bioinformatics*,  
1111 25(16), 2078–2079. doi:10.1093/bioinformatics/btp352
- 1112 Link, V., Kousathanas, A., Veeramah, K., Sell, C., Scheu, A., & Wegmann, D.  
1113 (2017). ATLAS: Analysis Tools for Low-depth and Ancient Samples. *BioRxiv*,  
1114 105346. doi:10.1101/105346
- 1115 Magoč, T., & Salzberg, S. L. (2011). FLASH: Fast length adjustment of short reads to  
1116 improve genome assemblies. *Bioinformatics*, 27(21), 2957–2963.  
1117 doi:10.1093/bioinformatics/btr507
- 1118 Märki, F., & Witkop, B. (1963). The venom of the Colombian arrow poison frog  
1119 *Phyllobates bicolor*. *Experientia*, 19(8), 329–338. doi:10.1007/bf02152303
- 1120 Márquez, R., Corredor, G., Galvis, C., Góez, D., & Amézquita, A. (2012). Range  
1121 extension of the critically endangered true poison-dart frog, *Phyllobates*  
1122 *terribilis* (Anura: Dendrobatidae), in western Colombia. *Acta Herpetologica*,  
1123 7(2), 341–345. doi:10.13128/Acta\_Herpetol-11387
- 1124 Martins, E. P., & Hansen, T. F. (1997). Phylogenies and the comparative method: A  
1125 general approach to incorporating phylogenetic information into the analysis of  
1126 interspecific data. *The American Naturalist*, 149(4), 646–667.  
1127 doi:10.1086/286013
- 1128 Matsumura, Shun-ichi, Yokoyama, J., Tateishi, Y., & Maki, M. (2006). Intraspecific  
1129 variation of flower colour and its distribution within a sea lavender, *Limonium*  
1130 *wrightii* (Plumbaginaceae), in the northwestern Pacific Islands. *Journal of Plant*  
1131 *Research*, 119(6), 625–632. doi:10.1007/s10265-006-0022-7
- 1132 Matsumura, Shun'ichi, Yokohama, J., Fukuda, T., & Maki, M. (2009). Origin of the  
1133 disjunct distribution of flower colour polymorphism within *Limonium wrightii*  
1134 (Plumbaginaceae) in the Ryukyu Archipelago. *Biological Journal of the Linnean*  
1135 *Society*, 97(4), 709–717. doi:10.1111/j.1095-8312.2009.01253.x

- 1136 Maxson, L. R., & Myers, C. W. (1985). Albumin evolution in tropical poison frogs  
1137 (Dendrobatidae): A preliminary report. *Biotropica*, *17*(1), 50–56.  
1138 doi:10.2307/2388378
- 1139 Mayr, E. (1942). *Systematics and the Origin of Species from, the Viewpoint of a*  
1140 *Zoologist*. New York: Columbia University Press.
- 1141 Mayr, E. (1963). *Animal Species and Evolution*. Cambridge: Harvard University  
1142 Press.
- 1143 McKenna, A., Hanna, M., Banks, E., Sivachenko, A., Cibulskis, K., Kernytzky, A., ...  
1144 DePristo, M. A. (2010). The Genome Analysis Toolkit: A MapReduce  
1145 framework for analyzing next-generation DNA sequencing data. *Genome*  
1146 *Research*, *20*(9), 1297–1303. doi:10.1101/gr.107524.110
- 1147 Meisner, J., & Albrechtsen, A. (2018). Inferring population structure and admixture  
1148 proportions in low-depth NGS data. *Genetics*, *210*(2), 719–731.  
1149 doi:10.1534/genetics.118.301336
- 1150 Meyer, M., & Kircher, M. (2010). Illumina sequencing library preparation for highly  
1151 multiplexed target capture and sequencing. *Cold Spring Harbor Protocols*,  
1152 *2010*(6), pdb.prot5448-pdb.prot5448. doi:10.1101/pdb.prot5448
- 1153 Miller, S. A., Dykes, D. D., & Polesky, H. F. (1988). A simple salting out procedure  
1154 for extracting DNA from human nucleated cells. *Nucleic Acids Research*, *16*(3),  
1155 1215. doi:10.1093/nar/16.3.1215
- 1156 Myers, C. W., & Daly, J. W. (1976). Preliminary evaluation of skin toxins and  
1157 vocalizations in taxonomic and evolutionary studies of poison-dart frogs  
1158 (Dendrobatidae). *Bulletin of the American Museum of Natural History*, *157*(3),  
1159 173–262.
- 1160 Myers, C. W., Daly, J. W., & Malkin, B. (1978). A dangerously toxic new frog  
1161 (*Phylllobates*) used by Emberá Indians of western Colombia, with discussion of  
1162 blowgun fabrication and dart poisoning. *Bulletin of the American Museum of*  
1163 *Natural History*, *161*, 307–366.
- 1164 Norman, J. A., Christidis, L., Joseph, L., Slikas, B., & Alpers, D. (2002). Unravelling  
1165 a biogeographical knot: origin of the “leapfrog” distribution pattern of Australo-  
1166 Papuan sooty owls (Strigiformes) and logrunners (Passeriformes). *Proceedings*  
1167 *of the Royal Society B: Biological Sciences*, *269*(1505), 2127–2133.  
1168 doi:10.1098/rspb.2002.2136

- 1169 Olson, E. C., & Miller, R. L. (1958). *Morphological integration*. Chicago: University  
1170 of Chicago Press.
- 1171 Pagel, M. (1999). Inferring the historical patterns of biological evolution. *Nature*,  
1172 401(6756), 877–884. doi:10.1038/44766
- 1173 Palumbi, S. R., Martin, A., Romano, S., McMillan, W. O., Stice, L., & Grabowski, G.  
1174 (1991). *The simple fool's guide to PCR*. Honolulu: Department of Zoology,  
1175 University of Hawaii.
- 1176 Paradis, E., Claude, J., & Strimmer, K. (2004). APE: Analyses of phylogenetics and  
1177 evolution in R language. *Bioinformatics*, 20(2), 289–290.  
1178 doi:10.1093/bioinformatics/btg412
- 1179 Petersen, K. R., Streett, D. A., Gerritsen, A. T., Hunter, S. S., & Settles, M. L. (2015).  
1180 Super deduper, fast PCR duplicate detection in fastq files. In *Proceedings of the*  
1181 *6th ACM Conference on Bioinformatics, Computational Biology and Health*  
1182 *Informatics - BCB '15* (pp. 491–492). New York: ACM Press.  
1183 doi:10.1145/2808719.2811568
- 1184 Petkova, D., Novembre, J., & Stephens, M. (2015). Visualizing spatial population  
1185 structure with estimated effective migration surfaces. *Nature Genetics*, 48(1),  
1186 94–100. doi:10.1038/ng.3464
- 1187 Pinheiro, J., Bates, D., DebRoy, S., & Sarkar, D. (2017). nlme: Linear and Nonlinear  
1188 Mixed Effects Models. *R Package Version 3.1-131*.
- 1189 Pough, F. H., & Taigen, T. L. (1990). Metabolic correlates of the foraging and social  
1190 behaviour of dart-poison frogs. *Animal Behaviour*, 39(1), 145–155.  
1191 doi:10.1016/S0003-3472(05)80734-1
- 1192 Purcell, S., Neale, B., Todd-Brown, K., Thomas, L., Ferreira, M. A. R., Bender, D.,  
1193 ... Sham, P. C. (2007). PLINK: A tool set for whole-genome association and  
1194 population-based linkage analyses. *The American Journal of Human Genetics*,  
1195 81(3), 559–575. doi:10.1086/519795
- 1196 Quek, S.-P., Counterman, B. A., Albuquerque de Moura, P., Cardoso, M. Z.,  
1197 Marshall, C. R., McMillan, W. O., & Kronforst, M. R. (2010). Dissecting  
1198 comimetic radiations in *Heliconius* reveals divergent histories of convergent  
1199 butterflies. *Proceedings of the National Academy of Sciences of the United*  
1200 *States of America*, 107(16), 7365–7370. doi:10.1073/pnas.0911572107
- 1201 Rambaut, A., & Drummond, A. J. (2009). Tracer V1.5. Available from  
1202 <http://beast.bio.ed.ac.uk/tracer>.

- 1203 Ramírez, L. F., & Urrego, L. E. (2002). Vegetación holocénica en el delta del río San  
1204 Juan, Pacífico colombiano. In I. D. Correa & J. D. Restrepo (Eds.), *Geología y*  
1205 *Oceanografía del Delta del Río San Juan. Litoral Pacífico Colombiano*. (1st ed.,  
1206 pp. 151–169). Medellín: Editorial Universidad EAFIT.
- 1207 Rebelo, A. G., & Siegfried, W. R. (1985). Colour and size of flowers in relation to  
1208 pollination of *Erica* species. *Oecologia*, *65*(4), 584–590.  
1209 doi:10.1007/BF00379677
- 1210 Reguera, S., Zamora-Camacho, F. J., & Moreno-Rueda, G. (2014). The lizard  
1211 *Psammodromus algirus* (Squamata: Lacertidae) is darker at high altitudes.  
1212 *Biological Journal of the Linnean Society*, *112*(1), 132–141.  
1213 doi:10.1111/bij.12250
- 1214 Remsen, J. V. (1984). High incidence of “leapfrog” pattern of geographic variation in  
1215 andean birds: implications for the speciation process. *Science*, *224*(4645), 171–  
1216 173. doi:10.1126/science.224.4645.171
- 1217 Reynolds, J., Weir, B. S., & Cockerham, C. C. (1983). Estimation of the coancestry  
1218 coefficient: Basis for a short-term genetic distance. *Genetics*, *105*(3), 767–779.  
1219 doi:10.1534/genetics.103.025387
- 1220 Reynolds, R. G., & Fitzpatrick, B. M. (2007). Assortative mating in poison-dart frogs  
1221 based on an ecologically important trait. *Evolution*, *61*(9), 2253–2259.  
1222 doi:10.1111/j.1558-5646.2007.00174.x
- 1223 Richmond, J. Q., & Reeder, T. W. (2002). Evidence for parallel ecological speciation  
1224 in scincid lizards of the *Eumeces skiltonianus* species group (Squamata:  
1225 Scincidae). *Evolution*, *56*(7), 1498–1513. doi:10.1111/j.0014-  
1226 3820.2002.tb01461.x
- 1227 Rios, E., & Álvarez-Castañeda, S. T. (2007). Environmental responses to altitudinal  
1228 gradients and subspecific validity in pocket gophers (*Thomomys bottae*) from  
1229 Baja California Sur, Mexico. *Journal of Mammalogy*, *88*(4), 926–934.  
1230 doi:10.1644/06-mamm-a-226r1.1
- 1231 Ronquist, F., Teslenko, M., van der Mark, P., Ayres, D. L., Darling, A., Höhna, S., ...  
1232 Huelsenbeck, J. P. (2012). MrBayes 3.2: Efficient Bayesian phylogenetic  
1233 inference and model choice across a large model space. *Systematic Biology*,  
1234 *61*(3), 539–542. doi:10.1093/sysbio/sys029
- 1235 Santos, J. C., Baquero, M., Barrio-Amorós, C., Coloma, L. A., Erdtmann, L. K.,  
1236 Lima, A. P., & Cannatella, D. C. (2014). Aposematism increases acoustic



- 1237 diversification and speciation in poison frogs. *Proceedings of the Royal Society*  
1238 *B: Biological Sciences*, 281(1796), 20141761. doi:10.1098/rspb.2014.1761
- 1239 Santos, J. C., & Cannatella, D. C. (2011). Phenotypic integration emerges from  
1240 aposematism and scale in poison frogs. *Proceedings of the National Academy of*  
1241 *Sciences of the United States of America*, 108(15), 6175–6180.  
1242 doi:10.1073/pnas.1010952108
- 1243 Santos, J. C., Coloma, L. A., Summers, K., Caldwell, J. P., Ree, R., & Cannatella, D.  
1244 C. (2009). Amazonian amphibian diversity is primarily derived from late  
1245 miocene andean lineages. *PLoS Biology*, 7(3), e56.  
1246 doi:10.1371/journal.pbio.1000056.st014
- 1247 Schliep, K. P. (2011). phangorn: phylogenetic analysis in R. *Bioinformatics*, 27(4),  
1248 592–593. doi:10.1093/bioinformatics/btq706
- 1249 Sheppard, P. M., Turner, J. R. G., Brown, K. S., Benson, W. W., & Singer, M. C.  
1250 (1985). Genetics and the Evolution of Mullerian Mimicry in *Heliconius*  
1251 Butterflies. *Philosophical Transactions of the Royal Society B: Biological*  
1252 *Sciences*, 308(1137), 433–610. doi:10.1098/rstb.1985.0066
- 1253 Silverstone, P. A. (1976). A revision of the poison-arrow frogs of the genus  
1254 *Phyllobates* Bibron in Sagra (Family Dendrobatidae). *Natural History Museum*  
1255 *of Los Angeles County, Science Bulletin*, 27, 1–53.
- 1256 Simpson, G. G. (1953). *The major features of evolution*. New York: Columbia  
1257 University Press.
- 1258 Simpson, J. T., Wong, K., Jackman, S. D., Schein, J. E., Jones, S. J. M., & Birol, I.  
1259 (2009). ABySS: A parallel assembler for short read sequence data. *Genome*  
1260 *Research*, 19(6), 1117–1123. doi:10.1101/gr.089532.108
- 1261 Skotte, L., Korneliussen, T. S., & Albrechtsen, A. (2013). Estimating individual  
1262 admixture proportions from next generation sequencing data. *Genetics*, 195(3),  
1263 693–702. doi:10.1534/genetics.113.154138
- 1264 Slater, G. S. C., & Birney, E. (2005). Automated generation of heuristics for  
1265 biological sequence comparison. *BMC Bioinformatics*, 6, 31. doi:10.1186/1471-  
1266 2105-6-31
- 1267 Smith, A. F. ., Hubley, R., & Green, P. (2013). RepeatMasker Open-4.0. Available at  
1268 <http://www.repeatmasker.org>
- 1269 Summers, K., & Clough, M. E. (2001). The evolution of coloration and toxicity in the  
1270 poison frog family (Dendrobatidae). *Proceedings of the National Academy of*

- 1271 *Sciences of the United States of America*, 98(11), 6227–6232.  
1272 doi:10.1073/pnas.101134898
- 1273 Summers, K., Symula, R., Clough, M., & Cronin, T. (1999). Visual mate choice in  
1274 poison frogs. *Proceedings of the Royal Society B: Biological Sciences*,  
1275 266(1434), 2141–2145. doi:10.1098/rspb.1999.0900
- 1276 Sun, Y.-B., Xiong, Z.-J., Xiang, X.-Y., Liu, S.-P., Zhou, W.-W., Tu, X.-L., ... Zhang,  
1277 Y.-P. (2015). Whole-genome sequence of the Tibetan frog *Nanorana parkeri* and  
1278 the comparative evolution of tetrapod genomes. *Proceedings of the National  
1279 Academy of Sciences of the United States of America*, 112(11), E1257–E1262.  
1280 doi:10.1073/pnas.1501764112
- 1281 Toon, A., Austin, J. J., Dolman, G., Pedler, L., & Joseph, L. (2012). Evolution of arid  
1282 zone birds in Australia: Leapfrog distribution patterns and mesic-arid  
1283 connections in quail-thrush (*Cinclosoma*, Cinclosomatidae). *Molecular  
1284 Phylogenetics and Evolution*, 62(1), 286–295. doi:10.1016/j.ympev.2011.09.026
- 1285 Tullberg, B. S., Merilaita, S., & Wiklund, C. (2005). Aposematism and crypsis  
1286 combined as a result of distance dependence: Functional versatility of the colour  
1287 pattern in the swallowtail butterfly larva. *Proceedings of the Royal Society B:  
1288 Biological Sciences*, 272(1570), 1315–1321. doi:10.1098/rspb.2005.3079
- 1289 Turner, J. R., Johnson, M. S., & Eanes, W. F. (1979). Contrasted modes of evolution  
1290 in the same genome: allozymes and adaptive change in *Heliconius*. *Proceedings  
1291 of the National Academy of Sciences of the United States of America*, 76(4),  
1292 1924–1928. doi:10.1073/pnas.76.4.1924
- 1293 Turner, T. L., Hahn, M. W., & Nuzhdin, S. V. (2005). Genomic Islands of Speciation  
1294 in *Anopheles gambiae*. *PLoS Biology*, 3(9), e285.  
1295 doi:10.1371/journal.pbio.0030285.st001
- 1296 Twomey, E., Vestergaard, J. S., & Summers, K. (2014). Reproductive isolation  
1297 related to mimetic divergence in the poison frog *Ranitomeya imitator*. *Nature  
1298 Communications*, 5, 4749. doi:10.1038/ncomms5749
- 1299 Urrego, L. E., Molina, L. A., Urrego, D. H., & Ramírez, L. F. (2006). Holocene  
1300 space–time succession of the Middle Atrato wetlands, Chocó biogeographic  
1301 region, Colombia. *Palaeogeography, Palaeoclimatology, Palaeoecology*, 234(1),  
1302 45–61. doi:10.1016/j.palaeo.2005.10.018
- 1303 van Etten, J. (2017). R Package gdistance : Distances and Routes on Geographical  
1304 Grids. *Journal of Statistical Software*, 76(13), 1–21. doi:10.18637/jss.v076.i13



- 1305 Vanzolini, P. E., & Williams, E. E. (1970). South american anoles: the geographic  
1306 differentiation and evolution of the *Anolis chrysolepis* species group (Sauria,  
1307 Iguanidae). *Arquivos de Zoologia*, 19(1–2), 1–258. doi:10.11606/issn.2176-  
1308 7793.v19i3-4p125-298
- 1309 Vieira, F. G., Lassalle, F., Korneliussen, T. S., & Fumagalli, M. (2016). Improving  
1310 the estimation of genetic distances from next-generation sequencing data.  
1311 *Biological Journal of Linnean Society*, 117(1), 139–149. doi:10.1111/bij.12511
- 1312 Wang, I. J. (2013). Examining the full effects of landscape heterogeneity on spatial  
1313 genetic variation: A multiple matrix regression approach for quantifying  
1314 geographic and ecological isolation. *Evolution*, 67(12), 3403–3411.  
1315 doi:10.1111/evo.12134
- 1316 Weir, B. S., & Cockerham, C. C. (1984). Estimating F-statistics for the analysis of  
1317 population structure. *Evolution*, 38(6), 1358. doi:10.2307/2408641
- 1318 Widmer, A., Lötters, S., & Jungfer, K. H. (2000). A molecular phylogenetic analysis  
1319 of the neotropical dart-poison frog genus *Phyllobates* (Amphibia:  
1320 Dendrobatidae). *Die Naturwissenschaften*, 87(12), 559–562.  
1321 doi:10.1007/s001140050
- 1322 Wu, C.-I. (2001). The genic view of the process of speciation. *Journal of*  
1323 *Evolutionary Biology*, 14(6), 851–865. doi:10.1046/j.1420-9101.2001.00335.x
- 1324 Yang, Y., Richards-Zawacki, C. L., Devar, A., & Dugas, M. B. (2016). Poison frog  
1325 color morphs express assortative mate preferences in allopatry but not sympatry.  
1326 *Evolution*, 70(12), 2778–2788. doi:10.1111/evo.13079  
1327
- 1328  
1329  
1330  
1331  
1332  
1333
